# Supplementary material for: Role of p(Z)–π(Ar/Nap) conjugation in structures of 1-(arylchalcogena)naphthalenes for Z = Te versus Se, S and O: experimental and theoretical investigations
Source: Royal Society of Chemistry journal article supplement (doi:10.1039/c2dt30516j), 2012-01-01
Supplement: c2dt30516j.pdf [file c2dt30516j.pdf]

## Supporting Information

### Role of $\rho(Z)-\pi(\text{Ar}/\text{Nap})$ Conjugation in Structures of 1-(Arylchalcogena)naphthalenes for $Z = \text{Te}$ versus $\text{Se}$ , $\text{S}$ and $\text{O}$ : Experimental and Theoretical Investigations

Takahito Nakai,<sup>a</sup> Mitsuhiro Nishino,<sup>a</sup> Satoko Hayashi,<sup>a</sup> Masato Hashimoto<sup>a</sup> and Waro Nakanishi<sup>\*a</sup>

Department of Material Science and Chemistry, Faculty of Systems Engineering, Wakayama University, 930 Sakaedani, Wakayama 640-8510, Japan. Fax: +81 73 457 8253; Tel: +81 73 457 8252; E-mail: nakanisi@sys.wakayama-u.ac.jp

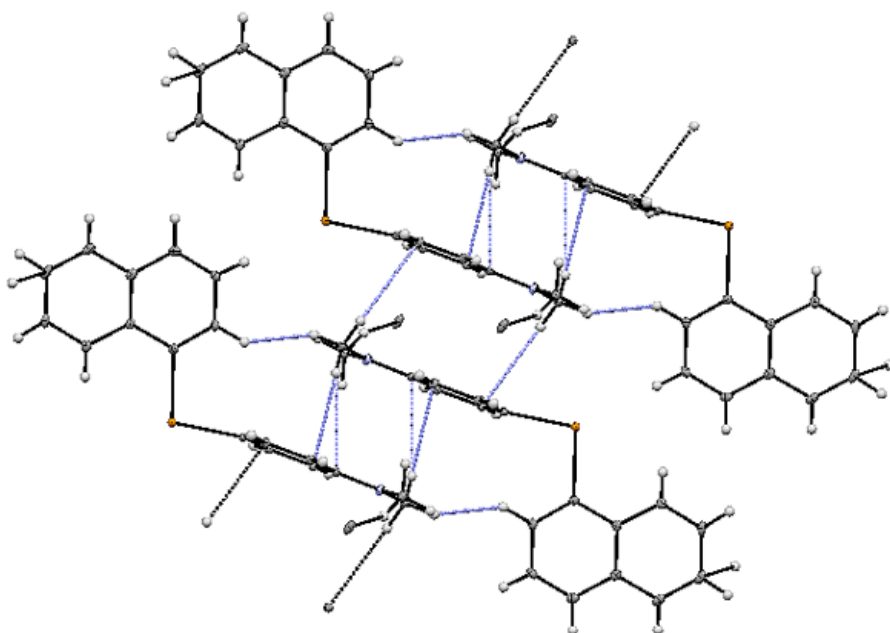

**Fig. S1** Intermolecular interactions of **1b** in the solid state.

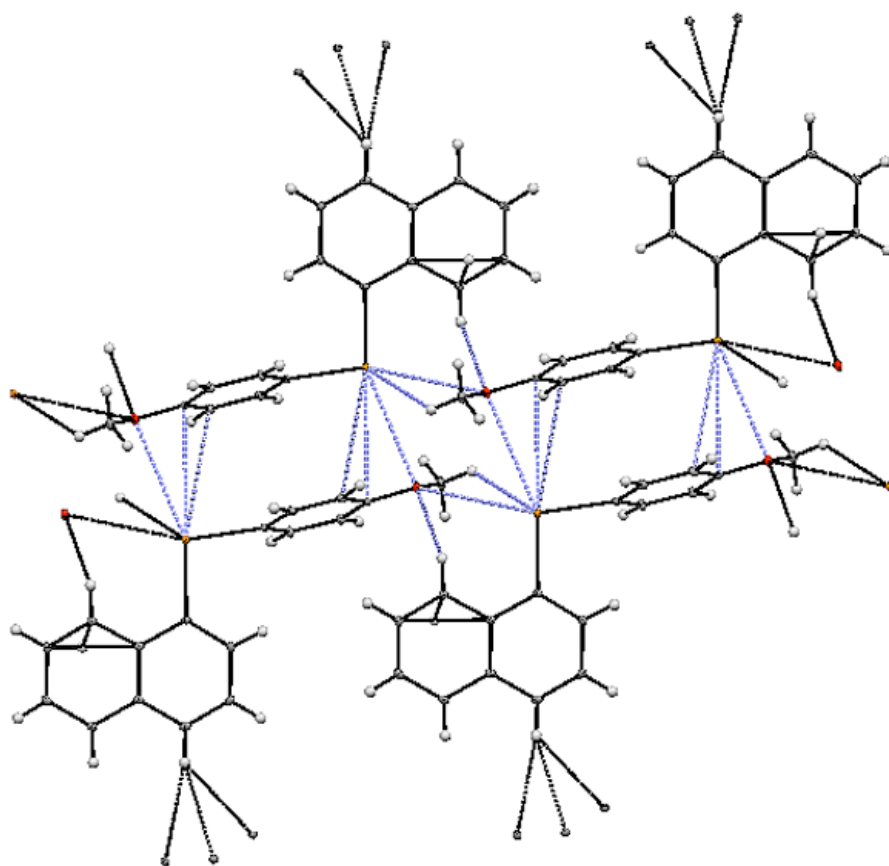

**Fig. S2** Intermolecular interactions of **1c** in the solid state.

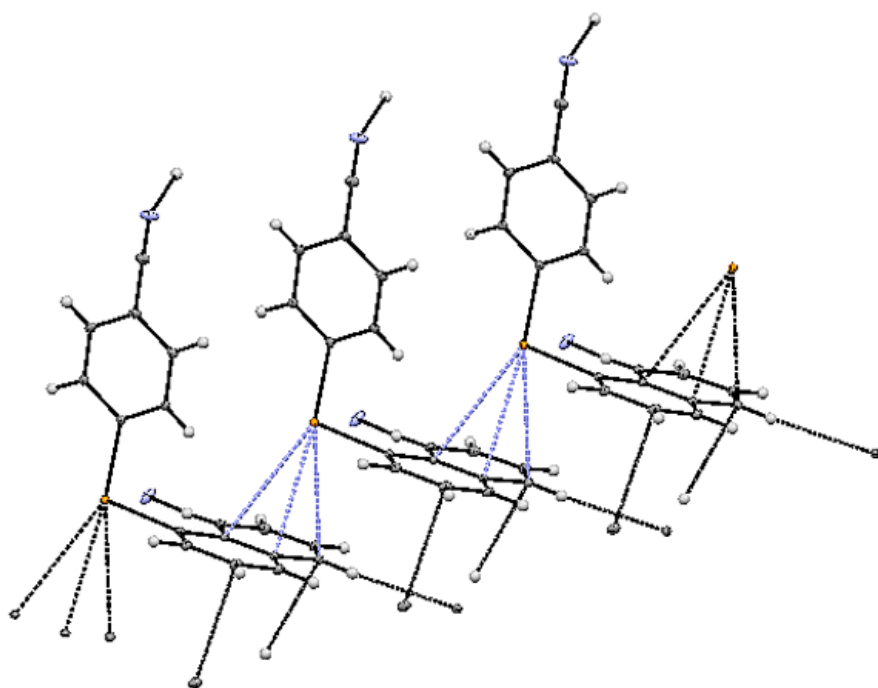

**Fig. S3** Intermolecular interactions of **1i** in the solid state.

**Table S1** Substituent Induced Chemical Shifts ( $\delta_{\text{SCS}}$ ) of  $^1\text{H}$  and  $^{13}\text{C}$  Nuclei of **3** and **4**

|                                   | NMe <sub>2</sub><br>(b) | OMe<br>(c) | Me<br>(d) | H<br>(a)                   | F<br>(e) | Cl<br>(f) | Br<br>(g) | COOEt<br>(h) | CN<br>(i) | NO <sub>2</sub><br>(j) |
|-----------------------------------|-------------------------|------------|-----------|----------------------------|----------|-----------|-----------|--------------|-----------|------------------------|
| <b>3 (Z = S)</b>                  |                         |            |           |                            |          |           |           |              |           |                        |
| $\delta(\text{H}_2)_{\text{SCS}}$ |                         | -0.288     | -0.105    | 0.000 (7.652) <sup>a</sup> |          | 0.024     | 0.040     | 0.200        |           | 0.286                  |
| $\delta(\text{H}_8)_{\text{SCS}}$ |                         | -0.001     | 0.000     | 0.000 (8.348) <sup>a</sup> |          | -0.053    | -0.057    | -0.074       |           | -0.126                 |
| $\delta(\text{C}_i)_{\text{SCS}}$ |                         | -11.7      | -4.4      | 0.0 (136.9) <sup>a</sup>   |          | -1.2      | -0.3      | 7.8          |           | 11.6                   |
| <b>4 (Z = O)</b>                  |                         |            |           |                            |          |           |           |              |           |                        |
| $\delta(\text{H}_2)_{\text{SCS}}$ |                         | -0.063     | -0.025    | 0.000 (7.602) <sup>a</sup> |          | 0.003     | 0.011     | 0.118        |           | 0.182                  |
| $\delta(\text{H}_8)_{\text{SCS}}$ |                         | 0.091      | 0.035     | 0.000 (8.201) <sup>a</sup> |          | 0.021     | 0.000     | -0.174       |           | -0.272                 |
| $\delta(\text{C}_i)_{\text{SCS}}$ |                         | -7.2       | -3.5      | 0.0 (157.9) <sup>a</sup>   |          | -1.2      | -0.6      | 4.5          |           | 6.1                    |

<sup>a</sup> $\delta(\text{H})_{\text{SCS}}$  and  $\delta(\text{C})_{\text{SCS}}$  are given for **3** and **4**, together with  $\delta(\text{H})$  and  $\delta(\text{C})$  for **3a** and **4a** in parenthesis, measured in chloroform-*d* (0.050 mol/L) at 24 °C.

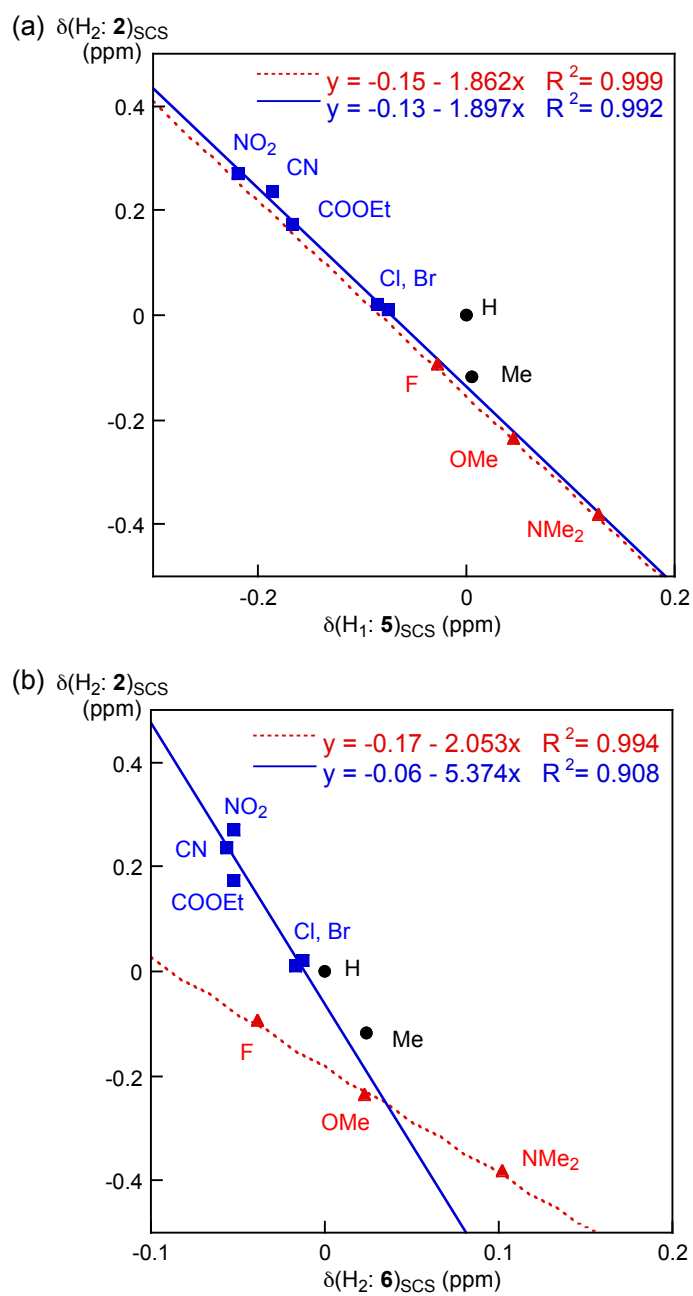

**Fig. S4** Plots of  $\delta(\text{H}_2: \mathbf{2})_{\text{SCS}}$  versus  $\delta(\text{H}_1: \mathbf{5})_{\text{SCS}}$  (a) and  $\delta(\text{H}_2: \mathbf{2})_{\text{SCS}}$  versus  $\delta(\text{H}_2: \mathbf{6})_{\text{SCS}}$  (b).

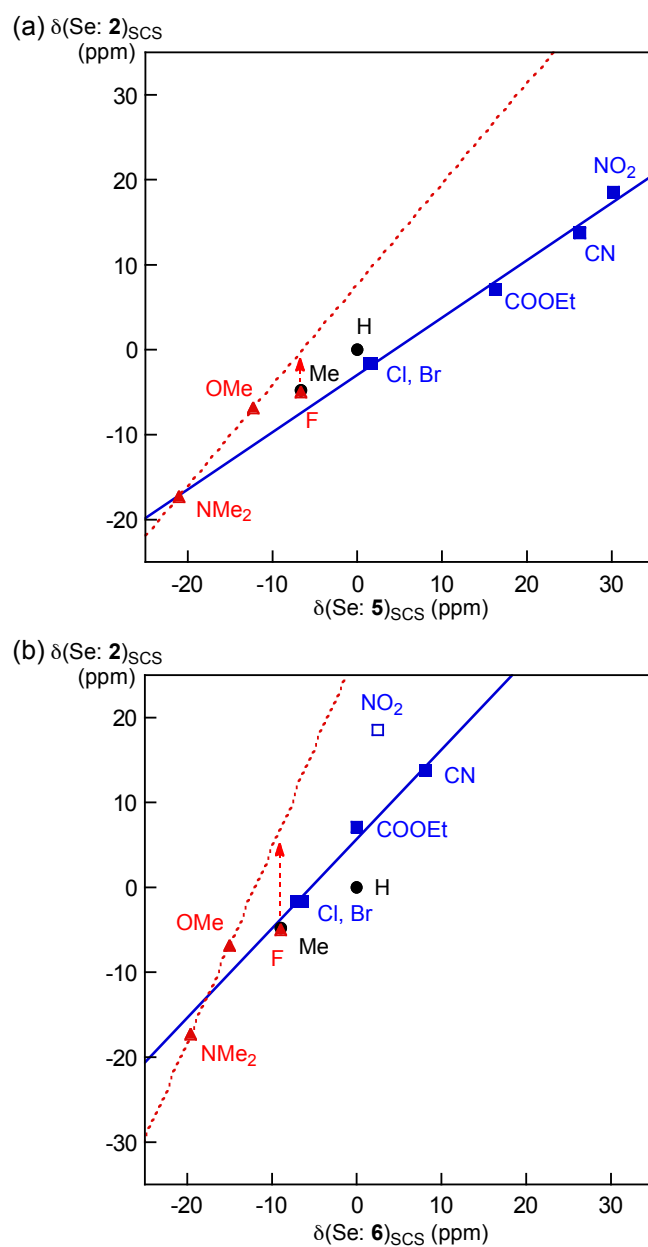

**Fig. S5** Plots of  $\delta(\text{Se: } \mathbf{2})_{\text{SCS}}$  versus  $\delta(\text{Se: } \mathbf{5})_{\text{SCS}}$  (a) and  $\delta(\text{Se: } \mathbf{2})_{\text{SCS}}$  versus  $\delta(\text{Se: } \mathbf{6})_{\text{SCS}}$  (b). G(l), G(m) and G(n) are drawn in black, red, and blue, respectively.

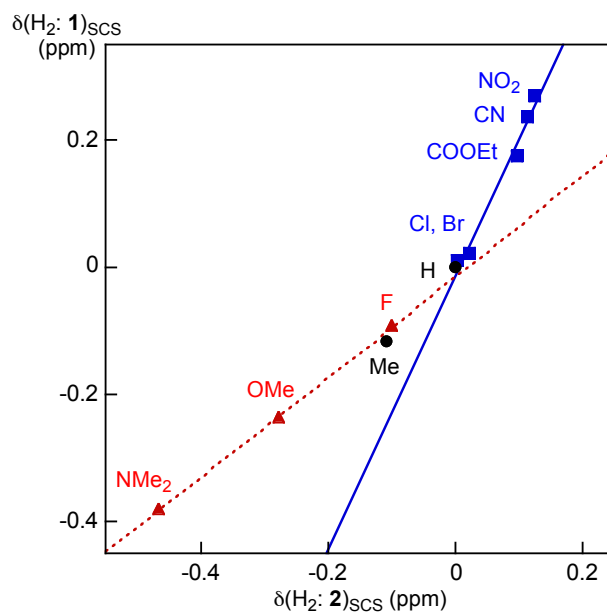

**Fig. S6** Plots of  $\delta(\text{H}_2: 1)_{\text{SCS}}$  versus  $\delta(\text{H}_2: 2)_{\text{SCS}}$ . G(I), G(m) and G(n) are drawn in black, red, and blue, respectively.

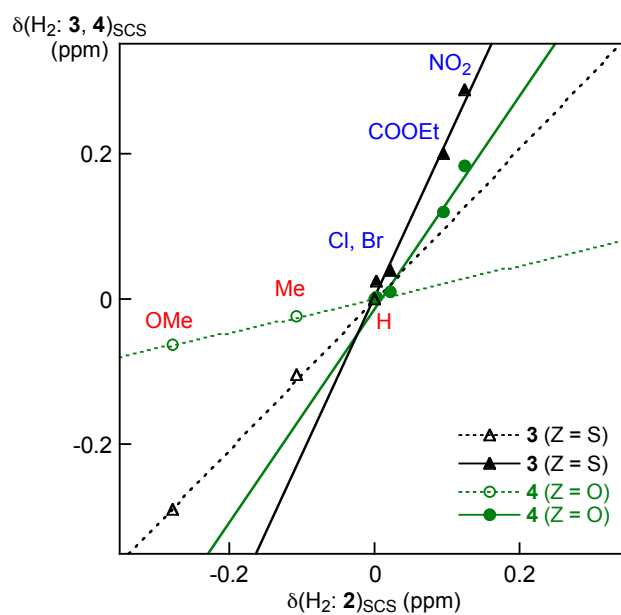

**Fig. S7** Plots of  $\delta(\text{H}_2)_{\text{SCS}}$  of **3** and **4** versus  $\delta(\text{H}_2: 2)_{\text{SCS}}$ . G(I) and G(m) are drawn in hollow and G(n) in solid.

**Table S2** Optimized structures and energies for 1-PhSC<sub>10</sub>H<sub>7</sub> (**3a**) at the MP2 level<sup>a</sup>

| Structure                                                    | <b>A</b>         | TS- <b>AB'</b> <sup>b</sup> | <b>B'</b> <sup>c</sup> | <b>B<sub>0</sub></b> <sup>d</sup> |
|--------------------------------------------------------------|------------------|-----------------------------|------------------------|-----------------------------------|
| <i>E</i> (au)                                                | -1012.6770       | -1012.6744                  | -1012.6745             | -1012.6744                        |
| $\Delta E$ (kJ mol <sup>-1</sup> )                           | 0.0 <sup>e</sup> | 7.0                         | 6.8                    | 6.9                               |
| <i>r</i> (S, C <sub>1</sub> ) (Å)                            | 1.7731           | 1.7806                      | 1.7802                 | 1.7800                            |
| <i>r</i> (S, C <sub>11</sub> ) (Å)                           | 1.7779           | 1.7745                      | 1.7721                 | 1.7717                            |
| $\angle$ C <sub>1</sub> SC <sub>11</sub> (°)                 | 101.43           | 100.67                      | 101.85                 | 102.30                            |
| $\angle$ C <sub>10</sub> C <sub>1</sub> SC <sub>11</sub> (°) | 67.48            | 136.38                      | 163.18                 | 180.00                            |
| $\angle$ C <sub>1</sub> SC <sub>11</sub> C <sub>12</sub> (°) | 38.14            | -66.09                      | -77.69                 | -90.34                            |
| $\nu_1^f$ (sym) (cm <sup>-1</sup> )                          | 27.3 (A)         | -11.7 (A)                   | 7.6 (A)                | -313.2 (A")                       |
| $\nu_2^g$ (sym) (cm <sup>-1</sup> )                          | 33.2 (A)         | 23.4 (A)                    | 29.5 (A)               | -7.0 (A")                         |
| ZC <sup>h</sup> (au)                                         | 0.2295           | 0.2297                      | 0.2293                 | 0.2279                            |
| GF <sup>i</sup> (au)                                         | 0.1876           | 0.1886                      | 0.1859                 | 0.1877                            |
| <i>E</i> <sub>GF</sub> <sup>j</sup> (au)                     | -1012.4895       | -1012.4858                  | -1012.4886             | -1012.4867                        |
| $\Delta E_{GF}$ (kJ mol <sup>-1</sup> )                      | 0.0 <sup>e</sup> | 9.8                         | 2.5                    | 7.4                               |

<sup>a</sup> The 6-311+G(3d) basis sets being employed for S with the 6-31G(d,p) basis sets for C and H. <sup>b</sup> Between **A** and **B'**. <sup>c</sup> Closer to **B**. <sup>d</sup> Corresponding to higher TS with two imaginary frequencies. <sup>e</sup> Taken as the standards for the energies. <sup>f</sup> Lowest frequency obtained by the frequency analysis. <sup>g</sup> Second-lowest frequency obtained by the frequency analysis. <sup>h</sup> Zero-point correction. <sup>i</sup> Thermal correction to Gibbs free energy at 298.15 K. <sup>j</sup> Sum of electronic and thermal Gibbs free energies at 298.15 K.

**Table S3** Optimized structures and energies for 1-PhOC<sub>10</sub>H<sub>7</sub> (**4a**) at the MP2 level<sup>a</sup>

| Structure                                                    | <b>A</b>         | TS- <b>AB</b> <sup>b</sup> | <b>B'</b> | TS- <b>B'B'</b> <sup>c</sup> | <b>B<sub>0</sub></b> <sup>d</sup> |
|--------------------------------------------------------------|------------------|----------------------------|-----------|------------------------------|-----------------------------------|
| <i>E</i> (au)                                                | -690.0841        | -690.0833                  | -690.0835 | -690.0831                    | -690.0831                         |
| $\Delta E$ (kJ mol <sup>-1</sup> )                           | 0.0 <sup>e</sup> | 1.9                        | 1.4       | 2.4                          | 2.6                               |
| <i>r</i> (O, C <sub>1</sub> ) (Å)                            | 1.3854           | 1.3842                     | 1.3809    | 1.3805                       | 1.3805                            |
| <i>r</i> (O, C <sub>11</sub> ) (Å)                           | 1.3838           | 1.3833                     | 1.3846    | 1.3868                       | 1.3868                            |
| $\angle$ C <sub>1</sub> OC <sub>11</sub> (°)                 | 117.15           | 117.64                     | 118.05    | 117.23                       | 117.23                            |
| $\angle$ C <sub>10</sub> C <sub>1</sub> OC <sub>11</sub> (°) | 77.82            | 115.92                     | 149.70    | -179.43                      | 180.00                            |
| $\angle$ C <sub>1</sub> OC <sub>11</sub> C <sub>12</sub> (°) | 12.64            | -22.07                     | -50.90    | -90.30                       | -91.70                            |
| $\nu_1^f$ (sym) (cm <sup>-1</sup> )                          | 27.4 (A)         | -13.7 (A)                  | 15.0 (A)  | -22.5 (A)                    | -335.3 (A")                       |
| $\nu_2^g$ (sym) (cm <sup>-1</sup> )                          | 35.3 (A)         | 30.9 (A)                   | 34.3 (A)  | 27.5 (A)                     | -22.8 (A")                        |
| ZC <sup>h</sup> (au)                                         | 0.2326           | 0.2316                     | 0.2322    | 0.2322                       | 0.2307                            |
| GF <sup>i</sup> (au)                                         | 0.1917           | 0.1924                     | 0.1908    | 0.1929                       | 0.1915                            |
| <i>E</i> <sub>GF</sub> <sup>j</sup> (au)                     | -689.8923        | -689.8909                  | -689.8927 | -689.8902                    | -689.8916                         |
| $\Delta E_{GF}$ (kJ mol <sup>-1</sup> )                      | 0.0 <sup>f</sup> | 3.8                        | -1.0      | 5.6                          | 2.0                               |

<sup>a</sup> The 6-311+G(3d) basis sets being employed for O with the 6-31G(d,p) basis sets for C and H. <sup>b</sup> Between **A** and **B'**, where the **B'** is very close to **C'**. <sup>c</sup> Between **B'** and another **B'**. <sup>d</sup> Corresponding to higher TS with two imaginary frequencies. <sup>e</sup> Taken as the standards for the energies. <sup>f</sup> Lowest frequency obtained by the frequency analysis. <sup>g</sup> Second-lowest frequency obtained by the frequency analysis. <sup>h</sup> Zero-point correction. <sup>i</sup> Thermal correction to Gibbs free energy at 298.15 K. <sup>j</sup> Sum of electronic and thermal Gibbs free energies at 298.15 K.



**Table S4** Various structures and the energies for **1–4** having *p*-Y of NH<sub>2</sub> (**b'**), Me (**c**), H (**a**), Cl (**f**) and NO<sub>2</sub> (**j**) calculated at the MP2 level.<sup>a,b</sup>

| Compound / Y =                                                                 | NH <sub>2</sub> ( <b>b'</b> ) | Me ( <b>c</b> ) | H ( <b>a</b> ) | Cl ( <b>f</b> )    | NO <sub>2</sub> ( <b>j</b> ) |
|--------------------------------------------------------------------------------|-------------------------------|-----------------|----------------|--------------------|------------------------------|
| <b>1: Z = Te</b>                                                               |                               |                 |                |                    |                              |
| ∠C <sub>10</sub> C <sub>1</sub> TeC <sub>11</sub> ( <b>A</b> ) (°)             | 63.26                         | 62.51           | 62.92          | 63.10              | 64.83                        |
| ∠C <sub>1</sub> TeC <sub>11</sub> C <sub>12</sub> ( <b>A</b> ) (°)             | 53.71                         | 40.40           | 38.15          | 36.84              | 26.87                        |
| ∠C <sub>10</sub> C <sub>1</sub> TeC <sub>11</sub> ( <b>B'</b> ) (°)            | 178.25                        | 176.61          | 174.68         | 171.31             | 64.83 <sup>c</sup>           |
| ∠C <sub>1</sub> TeC <sub>11</sub> C <sub>12</sub> ( <b>B'</b> ) (°)            | -90.08                        | -88.91          | -88.08         | -86.01             | 26.88 <sup>c</sup>           |
| ∠C <sub>10</sub> C <sub>1</sub> TeC <sub>11</sub> ( <b>A<sub>0</sub></b> ) (°) | 72.91                         | 72.97           | 73.13          | 73.03              | 73.13                        |
| ∠C <sub>1</sub> TeC <sub>11</sub> C <sub>12</sub> ( <b>A<sub>0</sub></b> ) (°) | 0.00                          | 0.00            | 0.00           | 0.00               | 0.00                         |
| ∠C <sub>10</sub> C <sub>1</sub> TeC <sub>11</sub> ( <b>B<sub>0</sub></b> ) (°) | 180.00                        | 180.00          | 180.00         | 180.00             | 180.00                       |
| ∠C <sub>1</sub> TeC <sub>11</sub> C <sub>12</sub> ( <b>B<sub>0</sub></b> ) (°) | -90.09                        | -89.62          | -89.92         | -89.99             | -90.11                       |
| <i>E</i> ( <b>A</b> ) <sup>d</sup> (au)                                        | -7282.0654                    | -7266.0487      | -7226.8627     | -7685.8835         | -7430.8558                   |
| Δ <i>E</i> ( <b>A</b> ) <sup>e</sup> (kJ mol <sup>-1</sup> )                   | as 0.0                        | as 0.0          | as 0.0         | as 0.0             | as 0.0                       |
| Δ <i>E</i> ( <b>B'</b> ) <sup>e</sup> (kJ mol <sup>-1</sup> )                  | 0.5                           | 2.9             | 3.5            | 4.3                | 0.0 <sup>c</sup>             |
| Δ <i>E</i> ( <b>A<sub>0</sub></b> ) <sup>e</sup> (kJ mol <sup>-1</sup> )       | as 0.0                        | as 0.0          | as 0.0         | as 0.0             | as 0.0                       |
| Δ <i>E</i> ( <b>B<sub>0</sub></b> ) <sup>e</sup> (kJ mol <sup>-1</sup> )       | -4.1                          | 0.0             | 0.9            | 1.9                | 6.5                          |
| <b>2: Z = Se</b>                                                               |                               |                 |                |                    |                              |
| ∠C <sub>10</sub> C <sub>1</sub> SeC <sub>11</sub> ( <b>A</b> ) (°)             | 65.99                         | 66.23           | 66.59          | 66.88              | 68.28                        |
| ∠C <sub>1</sub> SeC <sub>11</sub> C <sub>12</sub> ( <b>A</b> ) (°)             | 50.41                         | 42.40           | 40.31          | 39.09              | 29.05                        |
| ∠C <sub>10</sub> C <sub>1</sub> SeC <sub>11</sub> ( <b>B'</b> ) (°)            | 173.37                        | 155.90          | 150.24         | 93.99 <sup>c</sup> | 68.28 <sup>c</sup>           |
| ∠C <sub>1</sub> SeC <sub>11</sub> C <sub>12</sub> ( <b>B'</b> ) (°)            | -88.34                        | -77.59          | -73.16         | 47.39 <sup>c</sup> | 29.05 <sup>c</sup>           |
| ∠C <sub>10</sub> C <sub>1</sub> SeC <sub>11</sub> ( <b>A<sub>0</sub></b> ) (°) | 75.28                         | 75.51           | 75.69          | 75.64              | 75.77                        |
| ∠C <sub>1</sub> SeC <sub>11</sub> C <sub>12</sub> ( <b>A<sub>0</sub></b> ) (°) | 0.00                          | 0.00            | 0.00           | 0.00               | 0.00                         |
| ∠C <sub>10</sub> C <sub>1</sub> SeC <sub>11</sub> ( <b>B<sub>0</sub></b> ) (°) | 180.00                        | 180.00          | 180.00         | 180.00             | 180.00                       |
| ∠C <sub>1</sub> SeC <sub>11</sub> C <sub>12</sub> ( <b>B<sub>0</sub></b> ) (°) | -90.92                        | -90.47          | -90.71         | -90.77             | -90.86                       |
| <i>E</i> ( <b>A</b> ) <sup>d</sup> (au)                                        | -3070.2797                    | -3054.2633      | -3015.0774     | -3474.0982         | -3219.0709                   |
| Δ <i>E</i> ( <b>A</b> ) <sup>e</sup> (kJ mol <sup>-1</sup> )                   | as 0.0                        | as 0.0          | as 0.0         | as 0.0             | as 0.00                      |
| Δ <i>E</i> ( <b>B'</b> ) <sup>e</sup> (kJ mol <sup>-1</sup> )                  | 3.1                           | 5.5             | 5.9            | 4.1 <sup>f</sup>   | 0.0 <sup>c</sup>             |
| Δ <i>E</i> ( <b>A<sub>0</sub></b> ) <sup>e</sup> (kJ mol <sup>-1</sup> )       | as 0.0                        | as 0.0          | as 0.0         | as 0.0             | as 0.0                       |
| Δ <i>E</i> ( <b>B<sub>0</sub></b> ) <sup>e</sup> (kJ mol <sup>-1</sup> )       | -1.9                          | 2.4             | 3.4            | 4.5                | 9.4                          |
| <b>3: Z = S</b>                                                                |                               |                 |                |                    |                              |
| ∠C <sub>10</sub> C <sub>1</sub> SC <sub>11</sub> ( <b>A</b> ) (°)              | 66.99                         | 67.15           | 67.48          | 67.78              | 69.31                        |
| ∠C <sub>1</sub> SC <sub>11</sub> C <sub>12</sub> ( <b>A</b> ) (°)              | 47.17                         | 40.03           | 38.14          | 36.96              | 26.33                        |
| ∠C <sub>10</sub> C <sub>1</sub> SC <sub>11</sub> ( <b>B'</b> ) (°)             | 179.89                        | 171.18          | 163.18         | 67.78 <sup>c</sup> | 69.31 <sup>c</sup>           |
| ∠C <sub>1</sub> SC <sub>11</sub> C <sub>12</sub> ( <b>B'</b> ) (°)             | -90.65                        | -83.60          | -77.67         | 37.00 <sup>c</sup> | 26.33 <sup>c</sup>           |

|                                                        |            |            |            |                  |                    |
|--------------------------------------------------------|------------|------------|------------|------------------|--------------------|
| $\angle C_{10}C_1SC_{11}$ ( <b>A<sub>0</sub></b> ) (°) | 75.57      | 75.82      | 76.06      | 76.04            | 76.28              |
| $\angle C_1SC_{11}C_{12}$ ( <b>A<sub>0</sub></b> ) (°) | 0.00       | 0.00       | 0.00       | 0.00             | 0.00               |
| $\angle C_{10}C_1SC_{11}$ ( <b>B<sub>0</sub></b> ) (°) | 180.00     | 180.00     | 180.00     | 180.00           | 180.00             |
| $\angle C_1SC_{11}C_{12}$ ( <b>B<sub>0</sub></b> ) (°) | -91.12     | -90.74     | -90.94     | -90.99           | -91.07             |
| $E(\mathbf{A})^d$ (au)                                 | -1067.8791 | -1051.8630 | -1012.6770 | -1471.6978       | -1216.6708         |
| $\Delta E(\mathbf{A})^e$ (kJ mol <sup>-1</sup> )       | as 0.0     | as 0.0     | as 0.0     | as 0.0           | as 0.0             |
| $\Delta E(\mathbf{B}')^e$ (kJ mol <sup>-1</sup> )      | 3.1        | 6.2        | 6.8        | 0.0 <sup>c</sup> | 0.0 <sup>c</sup>   |
| $\Delta E(\mathbf{A}_0)^e$ (kJ mol <sup>-1</sup> )     | as 0.0     | as 0.0     | as 0.0     | as 0.0           | as 0.0             |
| $\Delta E(\mathbf{B}_0)^e$ (kJ mol <sup>-1</sup> )     | -1.8       | 3.2        | 4.2        | 5.4              | 11.0               |
| <b>4: Z = O</b>                                        |            |            |            |                  |                    |
| $\angle C_{10}C_1OC_{11}$ ( <b>A</b> ) (°)             | 75.82      | 77.27      | 77.82      | 78.35            | 80.34              |
| $\angle C_1OC_{11}C_{12}$ ( <b>A</b> ) (°)             | 17.16      | 13.36      | 12.64      | 11.27            | 7.14               |
| $\angle C_{10}C_1OC_{11}$ ( <b>B'</b> ) (°)            | 166.06     | 154.02     | 149.70     | 141.01           | 80.36 <sup>c</sup> |
| $\angle C_1OC_{11}C_{12}$ ( <b>B'</b> ) (°)            | -72.21     | -55.61     | -50.90     | -42.51           | 7.11 <sup>c</sup>  |
| $\angle C_{10}C_1OC_{11}$ ( <b>A<sub>0</sub></b> ) (°) | 83.86      | 83.93      | 84.23      | 83.99            | 84.11              |
| $\angle C_1OC_{11}C_{12}$ ( <b>A<sub>0</sub></b> ) (°) | 0.00       | 0.00       | 0.00       | 0.00             | 0.00               |
| $\angle C_{10}C_1OC_{11}$ ( <b>B<sub>0</sub></b> ) (°) | 180.00     | 180.00     | 180.00     | 180.00           | 180.00             |
| $\angle C_1OC_{11}C_{12}$ ( <b>B<sub>0</sub></b> ) (°) | -92.11     | -91.50     | -91.70     | -91.80           | -91.74             |
| $E(\mathbf{A})^d$ (au)                                 | -745.2841  | -729.2694  | -690.0841  | -1149.1045       | -894.2207          |
| $\Delta E(\mathbf{A})^e$ (kJ mol <sup>-1</sup> )       | as 0.0     | as 0.0     | as 0.0     | as 0.0           | as 0.0             |
| $\Delta E(\mathbf{B}')^e$ (kJ mol <sup>-1</sup> )      | -1.4       | 1.1        | 1.4        | 2.0              | 0.0 <sup>c</sup>   |
| $\Delta E(\mathbf{A}_0)^e$ (kJ mol <sup>-1</sup> )     | as 0.0     | as 0.0     | as 0.0     | as 0.0           | as 0.0             |
| $\Delta E(\mathbf{B}_0)^e$ (kJ mol <sup>-1</sup> )     | -1.7       | 1.5        | 2.2        | 3.3              | 8.7                |

<sup>a</sup> The basis sets of the (7433111/743111/7411/2 + 1s1p1d1f) type being employed for Te with the 6-31G(d,p) basis sets for C and H. <sup>b</sup> A stationary point being not obtained for typical **B**. <sup>c</sup> The value is almost the same if the thermal effect is considered, but it becomes -8.4 kJ mol<sup>-1</sup> if solvent effect is calculated by the IPCM method. <sup>d</sup>  $\Delta E = E(\mathbf{A}) - E(\mathbf{B})$ . <sup>e</sup> **A**. <sup>f</sup> **A'**.

### Optimized structures given by Cartesian coordinates

Optimized structures given by Cartesian coordinates for **1a–4a**, **1b'–4b'**, **1c–4c**, **1f–4f** and **1j–4j**, together with the total energies using the Gaussian 03 program.<sup>24</sup> The Møller-Plesset second-order energy correlation (MP2) level is applied to the calculations<sup>23</sup> with the 6-311+G(3d) basis sets<sup>27</sup> for O, S and Se, the (7433111/743111/7411/2 + 1s1p1d1f) basis sets<sup>32</sup> for Te and with the 6-31G(d,p) basis sets for C and H.

**1a (A):** MP2 = -7226.8626611 a.u.

|    |   |           |           |           |
|----|---|-----------|-----------|-----------|
| 6  | 0 | -1.641229 | 0.236844  | -0.284560 |
| 6  | 0 | -2.912843 | 0.573475  | 0.296573  |
| 6  | 0 | -1.050541 | 1.153197  | -1.194320 |
| 6  | 0 | -1.706717 | 2.314530  | -1.556870 |
| 6  | 0 | -2.959413 | 2.639685  | -0.990369 |
| 6  | 0 | -3.560914 | 1.771334  | -0.102215 |
| 1  | 0 | -0.094296 | 0.908253  | -1.640498 |
| 1  | 0 | -1.241808 | 2.994294  | -2.261206 |
| 1  | 0 | -3.462216 | 3.554599  | -1.280465 |
| 1  | 0 | -4.525949 | 2.010312  | 0.332465  |
| 6  | 0 | -0.998752 | -0.966106 | 0.152023  |
| 6  | 0 | -1.631929 | -1.816761 | 1.052064  |
| 6  | 0 | -2.907258 | -1.498877 | 1.571553  |
| 6  | 0 | -3.538251 | -0.332129 | 1.192905  |
| 1  | 0 | -1.127394 | -2.718460 | 1.379899  |
| 1  | 0 | -3.385844 | -2.180043 | 2.265470  |
| 1  | 0 | -4.509016 | -0.073824 | 1.603341  |
| 52 | 0 | 0.891063  | -1.554363 | -0.578265 |
| 6  | 0 | 1.936505  | 0.115123  | 0.183841  |
| 6  | 0 | 1.607358  | 0.645292  | 1.440737  |
| 6  | 0 | 2.970204  | 0.688156  | -0.572696 |
| 6  | 0 | 2.303926  | 1.754338  | 1.926734  |
| 6  | 0 | 3.677616  | 1.781937  | -0.064854 |
| 6  | 0 | 3.343004  | 2.319370  | 1.180662  |
| 1  | 0 | 0.810613  | 0.200083  | 2.026560  |
| 1  | 0 | 3.211656  | 0.291260  | -1.552856 |
| 1  | 0 | 2.041876  | 2.168713  | 2.893375  |
| 1  | 0 | 4.477773  | 2.220629  | -0.649582 |
| 1  | 0 | 3.884746  | 3.174617  | 1.566014  |

**1a (TS-AB'):** MP2 = -7226.860425 a.u.

|    |   |           |           |           |
|----|---|-----------|-----------|-----------|
| 6  | 0 | -2.007284 | -0.014494 | -0.001907 |
| 6  | 0 | -2.953057 | 1.047888  | -0.225719 |
| 6  | 0 | -2.341749 | -1.025543 | 0.939497  |
| 6  | 0 | -3.566063 | -1.023601 | 1.579979  |
| 6  | 0 | -4.502819 | 0.006456  | 1.338192  |
| 6  | 0 | -4.204787 | 1.012917  | 0.442846  |
| 1  | 0 | -1.626114 | -1.814389 | 1.138259  |
| 1  | 0 | -3.799563 | -1.807680 | 2.290626  |
| 1  | 0 | -5.460569 | -0.004382 | 1.844760  |
| 1  | 0 | -4.915447 | 1.811545  | 0.256909  |
| 6  | 0 | -0.760437 | 0.037437  | -0.701208 |
| 6  | 0 | -0.496673 | 1.065214  | -1.599770 |
| 6  | 0 | -1.430183 | 2.104984  | -1.799985 |
| 6  | 0 | -2.644817 | 2.082989  | -1.144604 |
| 1  | 0 | 0.446332  | 1.079819  | -2.135100 |
| 1  | 0 | -1.200645 | 2.900149  | -2.499860 |
| 1  | 0 | -3.371445 | 2.872729  | -1.305116 |
| 52 | 0 | 0.744932  | -1.426407 | -0.425769 |
| 6  | 0 | 2.185985  | -0.041735 | 0.250226  |
| 6  | 0 | 1.894869  | 0.801500  | 1.335372  |
| 6  | 0 | 3.439158  | 0.026875  | -0.377768 |
| 6  | 0 | 2.849956  | 1.722651  | 1.770444  |
| 6  | 0 | 4.397159  | 0.935530  | 0.083524  |
| 6  | 0 | 4.103352  | 1.785420  | 1.152425  |
| 1  | 0 | 0.928996  | 0.741287  | 1.824681  |
| 1  | 0 | 3.656231  | -0.613322 | -1.225244 |

|   |   |          |          |           |
|---|---|----------|----------|-----------|
| 1 | 0 | 2.620951 | 2.379283 | 2.601729  |
| 1 | 0 | 5.365150 | 0.985916 | -0.401204 |
| 1 | 0 | 4.844025 | 2.495275 | 1.500292  |

**1a (B')**: MP2 = -7226.8613271 a.u.

|    |   |           |           |           |
|----|---|-----------|-----------|-----------|
| 6  | 0 | -2.144279 | 0.125853  | 0.020223  |
| 6  | 0 | -3.012238 | 1.270726  | -0.019910 |
| 6  | 0 | -2.732715 | -1.166263 | 0.054830  |
| 6  | 0 | -4.104417 | -1.324666 | 0.111547  |
| 6  | 0 | -4.954723 | -0.196653 | 0.089328  |
| 6  | 0 | -4.415807 | 1.073477  | 0.048557  |
| 1  | 0 | -2.096438 | -2.045194 | 0.081877  |
| 1  | 0 | -4.529538 | -2.320751 | 0.146033  |
| 1  | 0 | -6.029003 | -0.330026 | 0.134246  |
| 1  | 0 | -5.063827 | 1.943688  | 0.032095  |
| 6  | 0 | -0.733384 | 0.339248  | -0.053748 |
| 6  | 0 | -0.217705 | 1.626392  | -0.099244 |
| 6  | 0 | -1.083833 | 2.743228  | -0.110161 |
| 6  | 0 | -2.451649 | 2.573366  | -0.052116 |
| 1  | 0 | 0.852943  | 1.784272  | -0.152075 |
| 1  | 0 | -0.658994 | 3.740069  | -0.143158 |
| 1  | 0 | -3.115861 | 3.431007  | -0.066473 |
| 52 | 0 | 0.552719  | -1.346912 | -0.052403 |
| 6  | 0 | 2.345657  | -0.247782 | 0.017596  |
| 6  | 0 | 2.889049  | 0.129369  | 1.257576  |
| 6  | 0 | 2.997576  | 0.111208  | -1.174322 |
| 6  | 0 | 4.072398  | 0.871538  | 1.298769  |
| 6  | 0 | 4.181790  | 0.852070  | -1.121004 |
| 6  | 0 | 4.718834  | 1.231472  | 0.112467  |
| 1  | 0 | 2.384569  | -0.152582 | 2.174303  |
| 1  | 0 | 2.576191  | -0.183899 | -2.128137 |
| 1  | 0 | 4.490153  | 1.163401  | 2.255121  |
| 1  | 0 | 4.683702  | 1.129262  | -2.040545 |
| 1  | 0 | 5.637379  | 1.804701  | 0.149348  |

**1a (B<sub>0</sub>)**: MP2 = -7226.8612967 a.u.

|    |   |           |           |           |
|----|---|-----------|-----------|-----------|
| 6  | 0 | -1.243574 | -1.753104 | 0.000000  |
| 6  | 0 | -2.675226 | -1.880522 | 0.000000  |
| 6  | 0 | -0.459760 | -2.937495 | 0.000000  |
| 6  | 0 | -1.052620 | -4.185883 | 0.000000  |
| 6  | 0 | -2.460148 | -4.308014 | 0.000000  |
| 6  | 0 | -3.251696 | -3.177171 | 0.000000  |
| 1  | 0 | 0.623272  | -2.865103 | 0.000000  |
| 1  | 0 | -0.433475 | -5.075146 | 0.000000  |
| 1  | 0 | -2.916276 | -5.290788 | 0.000000  |
| 1  | 0 | -4.333297 | -3.264700 | 0.000000  |
| 6  | 0 | -0.677388 | -0.441187 | 0.000000  |
| 6  | 0 | -1.495707 | 0.679119  | 0.000000  |
| 6  | 0 | -2.901951 | 0.536814  | 0.000000  |
| 6  | 0 | -3.482945 | -0.714406 | 0.000000  |
| 1  | 0 | -1.062485 | 1.672240  | 0.000000  |
| 1  | 0 | -3.522166 | 1.425982  | 0.000000  |
| 1  | 0 | -4.562411 | -0.822683 | 0.000000  |
| 52 | 0 | 1.434194  | -0.245660 | 0.000000  |
| 6  | 0 | 1.454388  | 1.858407  | 0.000000  |
| 6  | 0 | 1.459898  | 2.560687  | 1.217207  |
| 6  | 0 | 1.459898  | 2.560687  | -1.217207 |
| 6  | 0 | 1.459898  | 3.958333  | 1.211171  |
| 6  | 0 | 1.459898  | 3.958333  | -1.211171 |
| 6  | 0 | 1.460877  | 4.656437  | 0.000000  |
| 1  | 0 | 1.458522  | 2.014860  | 2.153405  |
| 1  | 0 | 1.458522  | 2.014860  | -2.153405 |
| 1  | 0 | 1.462964  | 4.499395  | 2.150080  |
| 1  | 0 | 1.462964  | 4.499395  | -2.150080 |
| 1  | 0 | 1.462723  | 5.739800  | 0.000000  |

**1b' (A)**: MP2 = -7282.0654295 a.u.

|   |   |           |          |           |
|---|---|-----------|----------|-----------|
| 6 | 0 | -1.781438 | 0.509175 | -0.252867 |
| 6 | 0 | -2.853606 | 1.222817 | 0.386998  |
| 6 | 0 | -1.077351 | 1.151122 | -1.305702 |
| 6 | 0 | -1.447610 | 2.409030 | -1.743154 |
| 6 | 0 | -2.503868 | 3.106552 | -1.115751 |

|    |   |           |           |           |
|----|---|-----------|-----------|-----------|
| 6  | 0 | -3.209566 | 2.511108  | -0.089937 |
| 1  | 0 | -0.274193 | 0.618491  | -1.799717 |
| 1  | 0 | -0.903897 | 2.874448  | -2.556975 |
| 1  | 0 | -2.782712 | 4.093496  | -1.465582 |
| 1  | 0 | -4.028155 | 3.036182  | 0.391424  |
| 6  | 0 | -1.426191 | -0.778965 | 0.261572  |
| 6  | 0 | -2.163186 | -1.350972 | 1.293016  |
| 6  | 0 | -3.251123 | -0.660839 | 1.874146  |
| 6  | 0 | -3.594430 | 0.596756  | 1.423224  |
| 1  | 0 | -1.878107 | -2.324151 | 1.676273  |
| 1  | 0 | -3.815202 | -1.129043 | 2.672489  |
| 1  | 0 | -4.416055 | 1.139509  | 1.879282  |
| 52 | 0 | 0.176278  | -1.904706 | -0.531569 |
| 6  | 0 | 1.675202  | -0.517245 | -0.013992 |
| 6  | 0 | 1.796794  | -0.065448 | 1.309703  |
| 6  | 0 | 2.551755  | -0.019998 | -0.990919 |
| 6  | 0 | 2.770993  | 0.872551  | 1.644293  |
| 6  | 0 | 3.541246  | 0.900231  | -0.646044 |
| 6  | 0 | 3.649094  | 1.376795  | 0.669932  |
| 1  | 0 | 1.130643  | -0.445645 | 2.076418  |
| 1  | 0 | 2.461852  | -0.350740 | -2.019966 |
| 1  | 0 | 2.854918  | 1.219981  | 2.669053  |
| 1  | 0 | 4.217878  | 1.275077  | -1.407279 |
| 7  | 0 | 4.676815  | 2.257532  | 1.028220  |
| 1  | 0 | 4.463571  | 2.825472  | 1.835730  |
| 1  | 0 | 5.005019  | 2.832899  | 0.265767  |

**1b' (B')**: MP2 = -7282.065225 a.u.

|    |   |           |           |           |
|----|---|-----------|-----------|-----------|
| 6  | 0 | 2.429295  | 0.221775  | 0.017894  |
| 6  | 0 | 3.202648  | 1.432779  | -0.015674 |
| 6  | 0 | 3.118796  | -1.019828 | 0.004972  |
| 6  | 0 | 4.499732  | -1.069748 | 0.025537  |
| 6  | 0 | 5.257353  | 0.122689  | 0.012171  |
| 6  | 0 | 4.618734  | 1.346443  | 0.014690  |
| 1  | 0 | 2.554389  | -1.946788 | 0.019596  |
| 1  | 0 | 5.003158  | -2.029308 | 0.023574  |
| 1  | 0 | 6.339653  | 0.074397  | 0.028655  |
| 1  | 0 | 5.195369  | 2.265660  | 0.003794  |
| 6  | 0 | 1.004507  | 0.322621  | -0.013788 |
| 6  | 0 | 0.387480  | 1.565114  | -0.013237 |
| 6  | 0 | 1.161500  | 2.747660  | -0.022532 |
| 6  | 0 | 2.539694  | 2.686785  | -0.003074 |
| 1  | 0 | -0.693779 | 1.636247  | -0.030076 |
| 1  | 0 | 0.658081  | 3.707846  | -0.020506 |
| 1  | 0 | 3.133083  | 3.594978  | -0.013909 |
| 52 | 0 | -0.149313 | -1.457783 | -0.008638 |
| 6  | 0 | -2.019856 | -0.508784 | -0.000048 |
| 6  | 0 | -2.661331 | -0.188317 | -1.208940 |
| 6  | 0 | -2.649942 | -0.188281 | 1.214855  |
| 6  | 0 | -3.896335 | 0.456902  | -1.200434 |
| 6  | 0 | -3.884918 | 0.456819  | 1.217882  |
| 6  | 0 | -4.533776 | 0.770780  | 0.011728  |
| 1  | 0 | -2.186339 | -0.431855 | -2.152261 |
| 1  | 0 | -2.165969 | -0.431509 | 2.153670  |
| 1  | 0 | -4.382173 | 0.704293  | -2.138690 |
| 1  | 0 | -4.361967 | 0.704168  | 2.160649  |
| 7  | 0 | -5.739715 | 1.476762  | 0.017484  |
| 1  | 0 | -6.300317 | 1.343399  | -0.811672 |
| 1  | 0 | -6.292375 | 1.343383  | 0.851953  |

**1b' (B<sub>o</sub>)**: MP2 = -7282.0651953 a.u.

|   |   |           |           |          |
|---|---|-----------|-----------|----------|
| 6 | 0 | -1.320878 | -2.051062 | 0.000000 |
| 6 | 0 | -2.752851 | -2.175363 | 0.000000 |
| 6 | 0 | -0.539614 | -3.237216 | 0.000000 |
| 6 | 0 | -1.135223 | -4.484306 | 0.000000 |
| 6 | 0 | -2.543065 | -4.603408 | 0.000000 |
| 6 | 0 | -3.332123 | -3.470789 | 0.000000 |
| 1 | 0 | 0.543465  | -3.166332 | 0.000000 |
| 1 | 0 | -0.518074 | -5.375010 | 0.000000 |
| 1 | 0 | -3.001394 | -5.585207 | 0.000000 |
| 1 | 0 | -4.413961 | -3.556044 | 0.000000 |
| 6 | 0 | -0.751051 | -0.740877 | 0.000000 |

|    |   |           |           |           |
|----|---|-----------|-----------|-----------|
| 6  | 0 | -1.566722 | 0.381277  | 0.000000  |
| 6  | 0 | -2.973305 | 0.242612  | 0.000000  |
| 6  | 0 | -3.557641 | -1.007212 | 0.000000  |
| 1  | 0 | -1.129235 | 1.372789  | 0.000000  |
| 1  | 0 | -3.591349 | 1.133358  | 0.000000  |
| 1  | 0 | -4.637428 | -1.112788 | 0.000000  |
| 52 | 0 | 1.361163  | -0.542454 | 0.000000  |
| 6  | 0 | 1.386068  | 1.554933  | 0.000000  |
| 6  | 0 | 1.396520  | 2.266841  | 1.211915  |
| 6  | 0 | 1.396520  | 2.266841  | -1.211915 |
| 6  | 0 | 1.396520  | 3.660206  | 1.209172  |
| 6  | 0 | 1.396520  | 3.660206  | -1.209172 |
| 6  | 0 | 1.416155  | 4.375614  | 0.000000  |
| 1  | 0 | 1.390170  | 1.729152  | 2.152989  |
| 1  | 0 | 1.390170  | 1.729152  | -2.152989 |
| 1  | 0 | 1.400272  | 4.201477  | 2.149693  |
| 1  | 0 | 1.400272  | 4.201477  | -2.149693 |
| 7  | 0 | 1.348847  | 5.771402  | 0.000000  |
| 1  | 0 | 1.724846  | 6.202991  | 0.831817  |
| 1  | 0 | 1.724846  | 6.202991  | -0.831817 |

**1c (A):** MP2 = -7266.0487383 a.u.

|    |   |           |           |           |
|----|---|-----------|-----------|-----------|
| 6  | 0 | -1.783272 | 0.510263  | -0.271962 |
| 6  | 0 | -2.867159 | 1.238804  | 0.330097  |
| 6  | 0 | -1.052725 | 1.130112  | -1.320020 |
| 6  | 0 | -1.409234 | 2.380446  | -1.789395 |
| 6  | 0 | -2.478844 | 3.091555  | -1.201062 |
| 6  | 0 | -3.209192 | 2.518117  | -0.180055 |
| 1  | 0 | -0.236665 | 0.588966  | -1.783205 |
| 1  | 0 | -0.844247 | 2.829729  | -2.597661 |
| 1  | 0 | -2.746490 | 4.072310  | -1.575977 |
| 1  | 0 | -4.036665 | 3.054519  | 0.272661  |
| 6  | 0 | -1.444334 | -0.768314 | 0.276471  |
| 6  | 0 | -2.200525 | -1.315376 | 1.307675  |
| 6  | 0 | -3.298579 | -0.610701 | 1.850926  |
| 6  | 0 | -3.630314 | 0.636710  | 1.364375  |
| 1  | 0 | -1.924586 | -2.279933 | 1.718317  |
| 1  | 0 | -3.878828 | -1.059445 | 2.648760  |
| 1  | 0 | -4.460337 | 1.190511  | 1.790931  |
| 52 | 0 | 0.157813  | -1.919465 | -0.472327 |
| 6  | 0 | 1.660057  | -0.516633 | 0.008018  |
| 6  | 0 | 1.615552  | 0.185682  | 1.221761  |
| 6  | 0 | 2.708564  | -0.280159 | -0.893371 |
| 6  | 0 | 2.608737  | 1.120952  | 1.516513  |
| 6  | 0 | 3.708294  | 0.640783  | -0.569861 |
| 6  | 0 | 3.670249  | 1.361004  | 0.631439  |
| 1  | 0 | 0.807234  | 0.009472  | 1.923300  |
| 1  | 0 | 2.737716  | -0.801203 | -1.844409 |
| 1  | 0 | 2.559278  | 1.670639  | 2.451210  |
| 1  | 0 | 4.515355  | 0.818195  | -1.273539 |
| 6  | 0 | 4.762483  | 2.335891  | 0.984621  |
| 1  | 0 | 5.550211  | 1.849789  | 1.563383  |
| 1  | 0 | 5.219627  | 2.753734  | 0.088025  |
| 1  | 0 | 4.373539  | 3.160090  | 1.582219  |

**1c (B):** MP2 = -7266.0476169 a.u.

|   |   |           |           |           |
|---|---|-----------|-----------|-----------|
| 6 | 0 | 2.429708  | 0.230770  | 0.020972  |
| 6 | 0 | 3.195684  | 1.446276  | -0.017659 |
| 6 | 0 | 3.127273  | -1.006242 | 0.035755  |
| 6 | 0 | 4.508057  | -1.046712 | 0.076699  |
| 6 | 0 | 5.258104  | 0.150373  | 0.057252  |
| 6 | 0 | 4.611694  | 1.369786  | 0.034181  |
| 1 | 0 | 2.569095  | -1.936855 | 0.057803  |
| 1 | 0 | 5.017509  | -2.002857 | 0.095989  |
| 1 | 0 | 6.340312  | 0.109442  | 0.089754  |
| 1 | 0 | 5.182423  | 2.292579  | 0.019170  |
| 6 | 0 | 1.004879  | 0.322371  | -0.034294 |
| 6 | 0 | 0.380106  | 1.560796  | -0.060525 |
| 6 | 0 | 1.146927  | 2.748005  | -0.072465 |
| 6 | 0 | 2.524914  | 2.696091  | -0.031455 |
| 1 | 0 | -0.700878 | 1.626004  | -0.097079 |
| 1 | 0 | 0.637683  | 3.704907  | -0.090967 |

|    |   |           |           |           |
|----|---|-----------|-----------|-----------|
| 1  | 0 | 3.112761  | 3.607795  | -0.045366 |
| 52 | 0 | -0.132612 | -1.467655 | -0.028031 |
| 6  | 0 | -2.012546 | -0.526669 | 0.000587  |
| 6  | 0 | -2.664804 | -0.213312 | -1.203474 |
| 6  | 0 | -2.617738 | -0.195654 | 1.224476  |
| 6  | 0 | -3.904378 | 0.429401  | -1.174487 |
| 6  | 0 | -3.857087 | 0.447449  | 1.234141  |
| 6  | 0 | -4.516873 | 0.770756  | 0.039697  |
| 1  | 0 | -2.200494 | -0.465471 | -2.149867 |
| 1  | 0 | -2.117034 | -0.434298 | 2.155682  |
| 1  | 0 | -4.399754 | 0.673134  | -2.108799 |
| 1  | 0 | -4.315813 | 0.705118  | 2.183317  |
| 6  | 0 | -5.872517 | 1.426177  | 0.061580  |
| 1  | 0 | -6.667118 | 0.678196  | 0.087381  |
| 1  | 0 | -6.024751 | 2.041152  | -0.824944 |
| 1  | 0 | -5.986509 | 2.061241  | 0.939659  |

**1c (B<sub>0</sub>):** MP2 = -7266.0475868 a.u.

|    |   |           |           |           |
|----|---|-----------|-----------|-----------|
| 6  | 0 | -1.322702 | -2.052037 | 0.000000  |
| 6  | 0 | -2.755046 | -2.171610 | 0.000000  |
| 6  | 0 | -0.545422 | -3.240740 | 0.000000  |
| 6  | 0 | -1.145148 | -4.485846 | 0.000000  |
| 6  | 0 | -2.553338 | -4.600271 | 0.000000  |
| 6  | 0 | -3.338640 | -3.465076 | 0.000000  |
| 1  | 0 | 0.537959  | -3.174054 | 0.000000  |
| 1  | 0 | -0.530908 | -5.378519 | 0.000000  |
| 1  | 0 | -3.014873 | -5.580530 | 0.000000  |
| 1  | 0 | -4.420722 | -3.546673 | 0.000000  |
| 6  | 0 | -0.749039 | -0.743386 | 0.000000  |
| 6  | 0 | -1.561208 | 0.381401  | 0.000000  |
| 6  | 0 | -2.968208 | 0.246939  | 0.000000  |
| 6  | 0 | -3.556262 | -1.001024 | 0.000000  |
| 1  | 0 | -1.121920 | 1.371930  | 0.000000  |
| 1  | 0 | -3.583545 | 1.139524  | 0.000000  |
| 1  | 0 | -4.636331 | -1.103289 | 0.000000  |
| 52 | 0 | 1.363609  | -0.557511 | 0.000000  |
| 6  | 0 | 1.393809  | 1.544756  | 0.000000  |
| 6  | 0 | 1.397435  | 2.251274  | 1.214242  |
| 6  | 0 | 1.397435  | 2.251274  | -1.214242 |
| 6  | 0 | 1.397435  | 3.647686  | 1.204584  |
| 6  | 0 | 1.397435  | 3.647686  | -1.204584 |
| 6  | 0 | 1.395414  | 4.365464  | 0.000000  |
| 1  | 0 | 1.393017  | 1.709900  | 2.153235  |
| 1  | 0 | 1.393017  | 1.709900  | -2.153235 |
| 1  | 0 | 1.394609  | 4.186649  | 2.146529  |
| 1  | 0 | 1.394609  | 4.186649  | -2.146529 |
| 6  | 0 | 1.437876  | 5.870795  | 0.000000  |
| 1  | 0 | 2.467945  | 6.232028  | 0.000000  |
| 1  | 0 | 0.944264  | 6.276670  | 0.882566  |
| 1  | 0 | 0.944264  | 6.276670  | -0.882566 |

**1f (A):** MP2 = -7685.8834751 a.u.

|    |   |           |           |           |
|----|---|-----------|-----------|-----------|
| 6  | 0 | -1.942946 | 0.671342  | -0.272094 |
| 6  | 0 | -2.878488 | 1.581074  | 0.332245  |
| 6  | 0 | -1.184540 | 1.122318  | -1.384617 |
| 6  | 0 | -1.379410 | 2.386004  | -1.909851 |
| 6  | 0 | -2.303883 | 3.275733  | -1.318572 |
| 6  | 0 | -3.057142 | 2.869107  | -0.236028 |
| 1  | 0 | -0.480844 | 0.443585  | -1.851260 |
| 1  | 0 | -0.797150 | 2.705458  | -2.766093 |
| 1  | 0 | -2.444833 | 4.264921  | -1.737556 |
| 1  | 0 | -3.774230 | 3.543937  | 0.219624  |
| 6  | 0 | -1.765216 | -0.612478 | 0.336601  |
| 6  | 0 | -2.537531 | -0.988937 | 1.430453  |
| 6  | 0 | -3.493637 | -0.103418 | 1.977255  |
| 6  | 0 | -3.666348 | 1.151981  | 1.432210  |
| 1  | 0 | -2.382893 | -1.960904 | 1.884824  |
| 1  | 0 | -4.090837 | -0.419659 | 2.824472  |
| 1  | 0 | -4.385179 | 1.842918  | 1.860422  |
| 52 | 0 | -0.385346 | -2.022193 | -0.410090 |
| 6  | 0 | 1.323445  | -0.835853 | -0.054831 |
| 6  | 0 | 1.403028  | -0.022752 | 1.086118  |

|    |   |          |           |           |
|----|---|----------|-----------|-----------|
| 6  | 0 | 2.391824 | -0.863512 | -0.964101 |
| 6  | 0 | 2.532676 | 0.765879  | 1.308162  |
| 6  | 0 | 3.534500 | -0.094606 | -0.732069 |
| 6  | 0 | 3.594164 | 0.719271  | 0.400692  |
| 1  | 0 | 0.583363 | 0.002829  | 1.795729  |
| 1  | 0 | 2.332239 | -1.473385 | -1.858980 |
| 1  | 0 | 2.596216 | 1.402162  | 2.182043  |
| 1  | 0 | 4.362518 | -0.113680 | -1.429472 |
| 17 | 0 | 5.005685 | 1.693466  | 0.683030  |

**1f (B')**: MP2 = -7685.8818274 a.u.

|    |   |           |           |           |
|----|---|-----------|-----------|-----------|
| 6  | 0 | 2.690065  | 0.295722  | 0.032596  |
| 6  | 0 | 3.397846  | 1.545168  | -0.029093 |
| 6  | 0 | 3.443655  | -0.902081 | 0.152594  |
| 6  | 0 | 4.820463  | -0.870362 | 0.267549  |
| 6  | 0 | 5.512400  | 0.360527  | 0.221972  |
| 6  | 0 | 4.810876  | 1.543111  | 0.100894  |
| 1  | 0 | 2.929924  | -1.856935 | 0.202842  |
| 1  | 0 | 5.373014  | -1.797079 | 0.367140  |
| 1  | 0 | 6.591889  | 0.375969  | 0.312901  |
| 1  | 0 | 5.336787  | 2.491612  | 0.067331  |
| 6  | 0 | 1.268359  | 0.313540  | -0.107003 |
| 6  | 0 | 0.587454  | 1.515343  | -0.235883 |
| 6  | 0 | 1.295711  | 2.738111  | -0.263356 |
| 6  | 0 | 2.669997  | 2.757245  | -0.144402 |
| 1  | 0 | -0.490839 | 1.524520  | -0.342066 |
| 1  | 0 | 0.743460  | 3.665840  | -0.360614 |
| 1  | 0 | 3.213508  | 3.695648  | -0.173416 |
| 52 | 0 | 0.221335  | -1.530709 | -0.084667 |
| 6  | 0 | -1.700466 | -0.680787 | -0.009687 |
| 6  | 0 | -2.424940 | -0.461638 | -1.193354 |
| 6  | 0 | -2.267257 | -0.327827 | 1.226955  |
| 6  | 0 | -3.697476 | 0.111568  | -1.144088 |
| 6  | 0 | -3.537017 | 0.249250  | 1.279672  |
| 6  | 0 | -4.243018 | 0.463032  | 0.092810  |
| 1  | 0 | -1.993303 | -0.733764 | -2.149330 |
| 1  | 0 | -1.714392 | -0.498788 | 2.143117  |
| 1  | 0 | -4.261120 | 0.283722  | -2.052329 |
| 1  | 0 | -3.978926 | 0.525566  | 2.228681  |
| 17 | 0 | -5.824669 | 1.177708  | 0.157023  |

**1f (B<sub>o</sub>)**: MP2 = -7685.8817941 a.u.

|    |   |           |           |           |
|----|---|-----------|-----------|-----------|
| 6  | 0 | -1.373449 | -2.338282 | 0.000000  |
| 6  | 0 | -2.804804 | -2.468830 | 0.000000  |
| 6  | 0 | -0.586708 | -3.520692 | 0.000000  |
| 6  | 0 | -1.176644 | -4.770445 | 0.000000  |
| 6  | 0 | -2.583896 | -4.895703 | 0.000000  |
| 6  | 0 | -3.378220 | -3.766807 | 0.000000  |
| 1  | 0 | 0.496285  | -3.446419 | 0.000000  |
| 1  | 0 | -0.555486 | -5.658262 | 0.000000  |
| 1  | 0 | -3.037665 | -5.879526 | 0.000000  |
| 1  | 0 | -4.459560 | -3.856929 | 0.000000  |
| 6  | 0 | -0.811190 | -1.024910 | 0.000000  |
| 6  | 0 | -1.631573 | 0.093745  | 0.000000  |
| 6  | 0 | -3.037518 | -0.051788 | 0.000000  |
| 6  | 0 | -3.615169 | -1.304529 | 0.000000  |
| 1  | 0 | -1.201445 | 1.088183  | 0.000000  |
| 1  | 0 | -3.659789 | 0.835862  | 0.000000  |
| 1  | 0 | -4.694340 | -1.415282 | 0.000000  |
| 52 | 0 | 1.300551  | -0.828121 | 0.000000  |
| 6  | 0 | 1.318229  | 1.274379  | 0.000000  |
| 6  | 0 | 1.324059  | 1.981010  | 1.214600  |
| 6  | 0 | 1.324059  | 1.981010  | -1.214600 |
| 6  | 0 | 1.324059  | 3.377143  | 1.216507  |
| 6  | 0 | 1.324059  | 3.377143  | -1.216507 |
| 6  | 0 | 1.324855  | 4.064218  | 0.000000  |
| 1  | 0 | 1.322689  | 1.440761  | 2.153942  |
| 1  | 0 | 1.322689  | 1.440761  | -2.153942 |
| 1  | 0 | 1.327249  | 3.928068  | 2.148555  |
| 1  | 0 | 1.327249  | 3.928068  | -2.148555 |
| 17 | 0 | 1.326035  | 5.801001  | 0.000000  |



**1j (A):** MP2 = -7430.8557595 a.u.

|    |   |           |           |           |
|----|---|-----------|-----------|-----------|
| 6  | 0 | -2.114350 | 0.707275  | -0.295604 |
| 6  | 0 | -2.995464 | 1.684628  | 0.284555  |
| 6  | 0 | -1.373905 | 1.066916  | -1.452628 |
| 6  | 0 | -1.536831 | 2.307047  | -2.041020 |
| 6  | 0 | -2.409273 | 3.262708  | -1.473924 |
| 6  | 0 | -3.143313 | 2.945850  | -0.349056 |
| 1  | 0 | -0.710827 | 0.336734  | -1.901306 |
| 1  | 0 | -0.969817 | 2.556548  | -2.930040 |
| 1  | 0 | -2.525572 | 4.232406  | -1.942878 |
| 1  | 0 | -3.819767 | 3.672179  | 0.089001  |
| 6  | 0 | -1.965916 | -0.546250 | 0.380494  |
| 6  | 0 | -2.713393 | -0.831325 | 1.518445  |
| 6  | 0 | -3.616847 | 0.120411  | 2.042840  |
| 6  | 0 | -3.761281 | 1.348626  | 1.431474  |
| 1  | 0 | -2.580657 | -1.782036 | 2.021880  |
| 1  | 0 | -4.196360 | -0.123791 | 2.925310  |
| 1  | 0 | -4.439681 | 2.089688  | 1.841297  |
| 52 | 0 | -0.672548 | -2.049572 | -0.333377 |
| 6  | 0 | 1.104893  | -0.949680 | -0.053214 |
| 6  | 0 | 1.186925  | 0.052836  | 0.926971  |
| 6  | 0 | 2.222758  | -1.234382 | -0.855008 |
| 6  | 0 | 2.368043  | 0.774050  | 1.098807  |
| 6  | 0 | 3.416627  | -0.534723 | -0.678383 |
| 6  | 0 | 3.463410  | 0.462110  | 0.294564  |
| 1  | 0 | 0.329297  | 0.272601  | 1.552641  |
| 1  | 0 | 2.161314  | -1.994770 | -1.625918 |
| 1  | 0 | 2.452382  | 1.554179  | 1.842426  |
| 1  | 0 | 4.288940  | -0.737628 | -1.283656 |
| 7  | 0 | 4.711700  | 1.215802  | 0.475482  |
| 8  | 0 | 4.727488  | 2.102247  | 1.346554  |
| 8  | 0 | 5.673620  | 0.919559  | -0.253732 |

**1j (B'):** MP2 = -7430.8557595 a.u.

|    |   |           |           |           |
|----|---|-----------|-----------|-----------|
| 6  | 0 | -2.114345 | 0.707264  | -0.295613 |
| 6  | 0 | -2.995457 | 1.684624  | 0.284539  |
| 6  | 0 | -1.373888 | 1.066901  | -1.452632 |
| 6  | 0 | -1.536797 | 2.307035  | -2.041021 |
| 6  | 0 | -2.409232 | 3.262704  | -1.473927 |
| 6  | 0 | -3.143287 | 2.945849  | -0.349069 |
| 1  | 0 | -0.710820 | 0.336711  | -1.901310 |
| 1  | 0 | -0.969775 | 2.556533  | -2.930037 |
| 1  | 0 | -2.525513 | 4.232407  | -1.942876 |
| 1  | 0 | -3.819740 | 3.672182  | 0.088982  |
| 6  | 0 | -1.965922 | -0.546260 | 0.380489  |
| 6  | 0 | -2.713413 | -0.831331 | 1.518431  |
| 6  | 0 | -3.616870 | 0.120407  | 2.042814  |
| 6  | 0 | -3.761291 | 1.348624  | 1.431447  |
| 1  | 0 | -2.580685 | -1.782041 | 2.021870  |
| 1  | 0 | -4.196397 | -0.123793 | 2.925276  |
| 1  | 0 | -4.439693 | 2.089689  | 1.841260  |
| 52 | 0 | -0.672544 | -2.049585 | -0.333361 |
| 6  | 0 | 1.104890  | -0.949680 | -0.053205 |
| 6  | 0 | 2.222755  | -1.234375 | -0.855001 |
| 6  | 0 | 1.186919  | 0.052837  | 0.926980  |
| 6  | 0 | 3.416624  | -0.534715 | -0.678372 |
| 6  | 0 | 2.368028  | 0.774071  | 1.098801  |
| 6  | 0 | 3.463398  | 0.462128  | 0.294565  |
| 1  | 0 | 2.161310  | -1.994754 | -1.625920 |
| 1  | 0 | 0.329296  | 0.272588  | 1.552662  |
| 1  | 0 | 4.288946  | -0.737634 | -1.283629 |
| 1  | 0 | 2.452354  | 1.554220  | 1.842400  |
| 7  | 0 | 4.711683  | 1.215831  | 0.475475  |
| 8  | 0 | 5.673884  | 0.918976  | -0.253118 |
| 8  | 0 | 4.727184  | 2.102898  | 1.345919  |

**1j (B<sub>o</sub>):** MP2 = -7430.8527357 a.u.

|   |   |           |           |          |
|---|---|-----------|-----------|----------|
| 6 | 0 | -1.411863 | -2.544714 | 0.000000 |
| 6 | 0 | -2.842787 | -2.679790 | 0.000000 |
| 6 | 0 | -0.621065 | -3.724330 | 0.000000 |
| 6 | 0 | -1.206771 | -4.976042 | 0.000000 |
| 6 | 0 | -2.613592 | -5.105771 | 0.000000 |

|    |   |           |           |           |
|----|---|-----------|-----------|-----------|
| 6  | 0 | -3.411839 | -3.979660 | 0.000000  |
| 1  | 0 | 0.461829  | -3.647275 | 0.000000  |
| 1  | 0 | -0.582694 | -5.861751 | 0.000000  |
| 1  | 0 | -3.064005 | -6.091082 | 0.000000  |
| 1  | 0 | -4.492801 | -4.073414 | 0.000000  |
| 6  | 0 | -0.855181 | -1.229132 | 0.000000  |
| 6  | 0 | -1.678815 | -0.112875 | 0.000000  |
| 6  | 0 | -3.084277 | -0.263445 | 0.000000  |
| 6  | 0 | -3.657154 | -1.518264 | 0.000000  |
| 1  | 0 | -1.253620 | 0.883526  | 0.000000  |
| 1  | 0 | -3.709613 | 0.621960  | 0.000000  |
| 1  | 0 | -4.735875 | -1.632708 | 0.000000  |
| 52 | 0 | 1.256623  | -1.031966 | 0.000000  |
| 6  | 0 | 1.268857  | 1.072722  | 0.000000  |
| 6  | 0 | 1.275397  | 1.778193  | 1.216484  |
| 6  | 0 | 1.275397  | 1.778193  | -1.216484 |
| 6  | 0 | 1.275458  | 3.173955  | 1.223577  |
| 6  | 0 | 1.275458  | 3.173955  | -1.223577 |
| 6  | 0 | 1.277170  | 3.841844  | 0.000000  |
| 1  | 0 | 1.273963  | 1.234127  | 2.153378  |
| 1  | 0 | 1.273963  | 1.234127  | -2.153378 |
| 1  | 0 | 1.278659  | 3.739142  | 2.144978  |
| 1  | 0 | 1.278659  | 3.739142  | -2.144978 |
| 7  | 0 | 1.276206  | 5.314414  | 0.000000  |
| 8  | 0 | 1.275458  | 5.887907  | 1.102159  |
| 8  | 0 | 1.275458  | 5.887907  | -1.102159 |

**2a (A):** MP2 = -3015.0773862 a.u.

|    |   |           |           |           |
|----|---|-----------|-----------|-----------|
| 6  | 0 | -1.471896 | 0.180864  | -0.305195 |
| 6  | 0 | -2.712002 | 0.430858  | 0.376658  |
| 6  | 0 | -0.899626 | 1.225236  | -1.077432 |
| 6  | 0 | -3.355127 | 1.684236  | 0.204032  |
| 6  | 0 | -1.548532 | 2.437238  | -1.216895 |
| 6  | 0 | -2.773433 | 2.678853  | -0.555169 |
| 6  | 0 | -0.835008 | -1.082527 | -0.094768 |
| 6  | 0 | -3.318715 | -0.604762 | 1.134728  |
| 6  | 0 | -1.447348 | -2.066608 | 0.668227  |
| 6  | 0 | -2.693380 | -1.824570 | 1.288906  |
| 1  | 0 | 0.034242  | 1.045530  | -1.594265 |
| 1  | 0 | -4.298616 | 1.859192  | 0.710444  |
| 1  | 0 | -1.099980 | 3.218516  | -1.819144 |
| 1  | 0 | -3.270911 | 3.634342  | -0.671771 |
| 34 | 0 | 0.840020  | -1.515968 | -0.925128 |
| 1  | 0 | -4.267213 | -0.407467 | 1.623378  |
| 1  | 0 | -0.942611 | -3.014250 | 0.815394  |
| 1  | 0 | -3.157857 | -2.607359 | 1.876943  |
| 6  | 0 | 1.940158  | -0.238912 | 0.000640  |
| 6  | 0 | 1.758193  | 0.009731  | 1.367073  |
| 6  | 0 | 2.942320  | 0.430696  | -0.713370 |
| 6  | 0 | 2.579228  | 0.935867  | 2.013118  |
| 6  | 0 | 3.774906  | 1.336977  | -0.050980 |
| 6  | 0 | 3.590198  | 1.597672  | 1.309040  |
| 1  | 0 | 0.983369  | -0.514895 | 1.914442  |
| 1  | 0 | 3.064695  | 0.248140  | -1.775278 |
| 1  | 0 | 2.433991  | 1.133627  | 3.068722  |
| 1  | 0 | 4.552238  | 1.851998  | -0.603101 |
| 1  | 0 | 4.228348  | 2.310447  | 1.816920  |

**2a (TS-AB'):** MP2 = -3015.0751277 a.u.

|   |   |          |           |           |
|---|---|----------|-----------|-----------|
| 6 | 0 | 1.904254 | -0.093940 | -0.064995 |
| 6 | 0 | 2.805614 | 1.023672  | 0.025498  |
| 6 | 0 | 2.354427 | -1.364167 | 0.385671  |
| 6 | 0 | 4.133871 | 0.803421  | 0.475739  |
| 6 | 0 | 3.651021 | -1.540046 | 0.828134  |
| 6 | 0 | 4.546689 | -0.448080 | 0.883560  |
| 6 | 0 | 0.578819 | 0.151600  | -0.536698 |
| 6 | 0 | 2.377471 | 2.308728  | -0.393600 |
| 6 | 0 | 0.193507 | 1.419895  | -0.944240 |
| 6 | 0 | 1.086206 | 2.507235  | -0.839825 |
| 1 | 0 | 1.672831 | -2.205491 | 0.360226  |
| 1 | 0 | 4.812349 | 1.648787  | 0.524538  |
| 1 | 0 | 3.974593 | -2.518648 | 1.162606  |

|    |   |           |           |           |
|----|---|-----------|-----------|-----------|
| 1  | 0 | 5.562012  | -0.599323 | 1.230337  |
| 34 | 0 | -0.676178 | -1.304511 | -0.701083 |
| 1  | 0 | 3.071000  | 3.140162  | -0.324591 |
| 1  | 0 | -0.810954 | 1.581411  | -1.318928 |
| 1  | 0 | 0.763436  | 3.492288  | -1.156425 |
| 6  | 0 | -2.198053 | -0.399662 | 0.036725  |
| 6  | 0 | -3.302718 | -0.123632 | -0.779790 |
| 6  | 0 | -2.209214 | -0.034121 | 1.390969  |
| 6  | 0 | -4.421356 | 0.516023  | -0.236218 |
| 6  | 0 | -3.322786 | 0.621081  | 1.918555  |
| 6  | 0 | -4.430640 | 0.893250  | 1.108483  |
| 1  | 0 | -3.280553 | -0.402425 | -1.826666 |
| 1  | 0 | -1.353908 | -0.262137 | 2.016216  |
| 1  | 0 | -5.277097 | 0.727675  | -0.866333 |
| 1  | 0 | -3.330633 | 0.908393  | 2.963359  |
| 1  | 0 | -5.295670 | 1.395149  | 1.524676  |

**2a (B<sup>1</sup>):** MP2 = -3015.075142 a.u.

|    |   |           |           |           |
|----|---|-----------|-----------|-----------|
| 6  | 0 | 1.948579  | -0.068650 | -0.047081 |
| 6  | 0 | 2.832906  | 1.063143  | 0.019508  |
| 6  | 0 | 2.462129  | -1.349585 | 0.290621  |
| 6  | 0 | 4.201917  | 0.849849  | 0.328299  |
| 6  | 0 | 3.798378  | -1.519450 | 0.596808  |
| 6  | 0 | 4.674892  | -0.411347 | 0.626851  |
| 6  | 0 | 0.578504  | 0.167663  | -0.374010 |
| 6  | 0 | 2.343602  | 2.357071  | -0.292113 |
| 6  | 0 | 0.132460  | 1.444152  | -0.678815 |
| 6  | 0 | 1.012192  | 2.545054  | -0.603191 |
| 1  | 0 | 1.798827  | -2.206278 | 0.288570  |
| 1  | 0 | 4.866564  | 1.706985  | 0.358899  |
| 1  | 0 | 4.169728  | -2.506417 | 0.846153  |
| 1  | 0 | 5.721467  | -0.556851 | 0.866608  |
| 34 | 0 | -0.628360 | -1.332554 | -0.502597 |
| 1  | 0 | 3.023976  | 3.200680  | -0.244531 |
| 1  | 0 | -0.905023 | 1.603965  | -0.948344 |
| 1  | 0 | 0.641526  | 3.536218  | -0.837887 |
| 6  | 0 | -2.232157 | -0.426042 | 0.025317  |
| 6  | 0 | -3.221076 | -0.150150 | -0.928657 |
| 6  | 0 | -2.421630 | -0.063457 | 1.367234  |
| 6  | 0 | -4.400135 | 0.491513  | -0.536320 |
| 6  | 0 | -3.595601 | 0.589963  | 1.745377  |
| 6  | 0 | -4.586571 | 0.864597  | 0.796774  |
| 1  | 0 | -3.061895 | -0.429982 | -1.963246 |
| 1  | 0 | -1.654625 | -0.291421 | 2.097883  |
| 1  | 0 | -5.166075 | 0.703966  | -1.272705 |
| 1  | 0 | -3.741653 | 0.874206  | 2.780759  |
| 1  | 0 | -5.498901 | 1.365813  | 1.096541  |

**2a (TS-B<sup>1</sup>B<sup>1</sup>):** MP2 = -3015.0750215 a.u.

|    |   |           |           |           |
|----|---|-----------|-----------|-----------|
| 6  | 0 | -1.992134 | -0.040059 | -0.021226 |
| 6  | 0 | -2.870165 | 1.096016  | 0.018995  |
| 6  | 0 | -2.564234 | -1.339485 | 0.014958  |
| 6  | 0 | -4.273012 | 0.881790  | 0.003096  |
| 6  | 0 | -3.934977 | -1.512370 | 0.010083  |
| 6  | 0 | -4.798242 | -0.394126 | 0.022677  |
| 6  | 0 | -0.582455 | 0.193764  | 0.000113  |
| 6  | 0 | -2.325650 | 2.405441  | -0.014153 |
| 6  | 0 | -0.080762 | 1.484413  | -0.023833 |
| 6  | 0 | -0.959027 | 2.590725  | -0.008326 |
| 1  | 0 | -1.921177 | -2.212197 | 0.004030  |
| 1  | 0 | -4.929662 | 1.745533  | 0.014697  |
| 1  | 0 | -4.349449 | -2.513360 | 0.027719  |
| 1  | 0 | -5.871769 | -0.540498 | 0.018374  |
| 34 | 0 | 0.578380  | -1.347718 | -0.015163 |
| 1  | 0 | -2.999246 | 3.255538  | 0.000252  |
| 1  | 0 | 0.988601  | 1.653772  | -0.018810 |
| 1  | 0 | -0.544602 | 3.592222  | -0.025793 |
| 6  | 0 | 2.269730  | -0.450903 | 0.000587  |
| 6  | 0 | 2.883777  | -0.139917 | 1.222548  |
| 6  | 0 | 2.902001  | -0.134661 | -1.210649 |
| 6  | 0 | 4.125421  | 0.500599  | 1.227580  |
| 6  | 0 | 4.144003  | 0.505085  | -1.194387 |

|   |   |          |           |           |
|---|---|----------|-----------|-----------|
| 6 | 0 | 4.756199 | 0.821395  | 0.021919  |
| 1 | 0 | 2.386786 | -0.392614 | 2.151481  |
| 1 | 0 | 2.418520 | -0.382391 | -2.148013 |
| 1 | 0 | 4.600726 | 0.743027  | 2.170609  |
| 1 | 0 | 4.633584 | 0.751159  | -2.129131 |
| 1 | 0 | 5.719948 | 1.315963  | 0.030234  |

**2a (B<sub>o</sub>):** MP2 = -3015.0749573 a.u.

|    |   |           |           |           |
|----|---|-----------|-----------|-----------|
| 6  | 0 | -0.876811 | -1.789400 | 0.000000  |
| 6  | 0 | -2.289642 | -2.049299 | 0.000000  |
| 6  | 0 | 0.016182  | -2.893879 | 0.000000  |
| 6  | 0 | -2.742208 | -3.394410 | 0.000000  |
| 6  | 0 | -0.459004 | -4.191248 | 0.000000  |
| 6  | 0 | -1.848654 | -4.445987 | 0.000000  |
| 6  | 0 | -0.439071 | -0.428909 | 0.000000  |
| 6  | 0 | -3.204336 | -0.965013 | 0.000000  |
| 6  | 0 | -1.356564 | 0.608538  | 0.000000  |
| 6  | 0 | -2.742432 | 0.334481  | 0.000000  |
| 1  | 0 | 1.086639  | -2.722159 | 0.000000  |
| 1  | 0 | -3.810939 | -3.582182 | 0.000000  |
| 1  | 0 | 0.240517  | -5.018761 | 0.000000  |
| 1  | 0 | -2.210482 | -5.467262 | 0.000000  |
| 34 | 0 | 1.463060  | -0.103175 | 0.000000  |
| 1  | 0 | -4.268674 | -1.174460 | 0.000000  |
| 1  | 0 | -1.017311 | 1.636744  | 0.000000  |
| 1  | 0 | -3.442728 | 1.161926  | 0.000000  |
| 6  | 0 | 1.440862  | 1.811139  | 0.000000  |
| 6  | 0 | 1.447769  | 2.508727  | 1.216643  |
| 6  | 0 | 1.447769  | 2.508727  | -1.216643 |
| 6  | 0 | 1.447769  | 3.905868  | 1.211026  |
| 6  | 0 | 1.447769  | 3.905868  | -1.211026 |
| 6  | 0 | 1.449424  | 4.604253  | 0.000000  |
| 1  | 0 | 1.445515  | 1.958293  | 2.149803  |
| 1  | 0 | 1.445515  | 1.958293  | -2.149803 |
| 1  | 0 | 1.451781  | 4.446625  | 2.149938  |
| 1  | 0 | 1.451781  | 4.446625  | -2.149938 |
| 1  | 0 | 1.451407  | 5.687523  | 0.000000  |

**2a (A<sub>o</sub>):** MP2 = -3015.076251 a.u.

|    |   |           |           |           |
|----|---|-----------|-----------|-----------|
| 6  | 0 | -1.570138 | 0.093104  | -0.297230 |
| 6  | 0 | -2.803116 | 0.260939  | 0.421826  |
| 6  | 0 | -1.146067 | 1.129403  | -1.170158 |
| 6  | 0 | -3.593411 | 1.414771  | 0.177829  |
| 6  | 0 | -1.934783 | 2.244710  | -1.376143 |
| 6  | 0 | -3.156695 | 2.400757  | -0.682794 |
| 6  | 0 | -0.781024 | -1.066104 | -0.013432 |
| 6  | 0 | -3.252373 | -0.765370 | 1.293038  |
| 6  | 0 | -1.242684 | -2.042179 | 0.858228  |
| 6  | 0 | -2.479977 | -1.885768 | 1.521337  |
| 1  | 0 | -0.215449 | 1.008758  | -1.711074 |
| 1  | 0 | -4.531560 | 1.525679  | 0.711412  |
| 1  | 0 | -1.599183 | 3.020191  | -2.054504 |
| 1  | 0 | -3.765107 | 3.280978  | -0.853242 |
| 34 | 0 | 0.880070  | -1.389965 | -0.913448 |
| 1  | 0 | -4.197516 | -0.635049 | 1.809850  |
| 1  | 0 | -0.627031 | -2.912206 | 1.053116  |
| 1  | 0 | -2.825726 | -2.660166 | 2.195809  |
| 6  | 0 | 2.006903  | -0.123551 | -0.004264 |
| 6  | 0 | 1.541574  | 0.716404  | 1.014039  |
| 6  | 0 | 3.340288  | -0.042754 | -0.431158 |
| 6  | 0 | 2.422897  | 1.618383  | 1.616679  |
| 6  | 0 | 4.210599  | 0.861039  | 0.180184  |
| 6  | 0 | 3.753897  | 1.699617  | 1.201056  |
| 1  | 0 | 0.513520  | 0.655902  | 1.348302  |
| 1  | 0 | 3.698357  | -0.688532 | -1.226169 |
| 1  | 0 | 2.060616  | 2.264785  | 2.407645  |
| 1  | 0 | 5.241210  | 0.915783  | -0.150205 |
| 1  | 0 | 4.430162  | 2.402284  | 1.672083  |

**2b' (A):** MP2 = -3070.2796795 a.u.

|   |   |           |          |           |
|---|---|-----------|----------|-----------|
| 6 | 0 | -1.703529 | 0.310429 | -0.272069 |
| 6 | 0 | -2.794388 | 0.873610 | 0.475267  |

|    |   |           |           |           |
|----|---|-----------|-----------|-----------|
| 6  | 0 | -1.045656 | 1.125353  | -1.230080 |
| 6  | 0 | -3.214872 | 2.199267  | 0.191994  |
| 6  | 0 | -1.476485 | 2.415266  | -1.475355 |
| 6  | 0 | -2.553922 | 2.966066  | -0.745723 |
| 6  | 0 | -1.288041 | -1.020604 | 0.046523  |
| 6  | 0 | -3.489707 | 0.070905  | 1.417272  |
| 6  | 0 | -1.980560 | -1.771318 | 0.985872  |
| 6  | 0 | -3.084560 | -1.222043 | 1.675746  |
| 1  | 0 | -0.224106 | 0.708562  | -1.797661 |
| 1  | 0 | -4.048171 | 2.611644  | 0.751408  |
| 1  | 0 | -0.967162 | 3.017786  | -2.218378 |
| 1  | 0 | -2.881028 | 3.979275  | -0.947208 |
| 34 | 0 | 0.186558  | -1.864257 | -0.851282 |
| 1  | 0 | -4.325685 | 0.503872  | 1.956820  |
| 1  | 0 | -1.644964 | -2.776572 | 1.212579  |
| 1  | 0 | -3.614858 | -1.826757 | 2.402092  |
| 6  | 0 | 1.584479  | -0.717727 | -0.203886 |
| 6  | 0 | 1.712985  | -0.446196 | 1.164324  |
| 6  | 0 | 2.487323  | -0.145596 | -1.108922 |
| 6  | 0 | 2.733387  | 0.385753  | 1.618463  |
| 6  | 0 | 3.523112  | 0.666283  | -0.647251 |
| 6  | 0 | 3.643509  | 0.965423  | 0.718436  |
| 1  | 0 | 1.020200  | -0.888570 | 1.871346  |
| 1  | 0 | 2.385727  | -0.339892 | -2.170980 |
| 1  | 0 | 2.826035  | 0.594289  | 2.679387  |
| 1  | 0 | 4.222598  | 1.101298  | -1.353632 |
| 7  | 0 | 4.714179  | 1.738222  | 1.189544  |
| 1  | 0 | 4.518278  | 2.211704  | 2.060100  |
| 1  | 0 | 5.072451  | 2.391313  | 0.507221  |

**2b' (B')**: MP2 = -3070.2785101 a.u.

|    |   |           |           |           |
|----|---|-----------|-----------|-----------|
| 6  | 0 | -2.325885 | 0.015471  | 0.022317  |
| 6  | 0 | -3.138497 | 1.199427  | -0.016294 |
| 6  | 0 | -2.972469 | -1.248476 | 0.063678  |
| 6  | 0 | -4.548796 | 1.068792  | 0.074243  |
| 6  | 0 | -4.348964 | -1.339993 | 0.139675  |
| 6  | 0 | -5.146558 | -0.173949 | 0.125024  |
| 6  | 0 | -0.908310 | 0.164137  | -0.078975 |
| 6  | 0 | -2.518490 | 2.474694  | -0.054679 |
| 6  | 0 | -0.332950 | 1.422865  | -0.127921 |
| 6  | 0 | -1.145333 | 2.578396  | -0.133810 |
| 1  | 0 | -2.379425 | -2.155708 | 0.084154  |
| 1  | 0 | -5.154821 | 1.968848  | 0.062954  |
| 1  | 0 | -4.820377 | -2.314786 | 0.181278  |
| 1  | 0 | -6.225226 | -0.256555 | 0.185476  |
| 34 | 0 | 0.167805  | -1.438569 | -0.086012 |
| 1  | 0 | -3.141915 | 3.362365  | -0.065265 |
| 1  | 0 | 0.742823  | 1.525747  | -0.198325 |
| 1  | 0 | -0.673675 | 3.553713  | -0.172101 |
| 6  | 0 | 1.902056  | -0.642860 | -0.016774 |
| 6  | 0 | 2.611073  | -0.387250 | -1.199381 |
| 6  | 0 | 2.493354  | -0.344872 | 1.219779  |
| 6  | 0 | 3.882726  | 0.180044  | -1.145253 |
| 6  | 0 | 3.763816  | 0.223833  | 1.269441  |
| 6  | 0 | 4.484721  | 0.473364  | 0.089458  |
| 1  | 0 | 2.158541  | -0.616552 | -2.156886 |
| 1  | 0 | 1.950224  | -0.543207 | 2.136211  |
| 1  | 0 | 4.424452  | 0.378652  | -2.064106 |
| 1  | 0 | 4.213956  | 0.455768  | 2.229034  |
| 7  | 0 | 5.733226  | 1.101998  | 0.139800  |
| 1  | 0 | 6.238073  | 0.943961  | 0.999982  |
| 1  | 0 | 6.320474  | 0.913359  | -0.659773 |

**2b' (A<sub>0</sub>)**: MP2 = -3070.2777182 a.u.

|   |   |           |           |           |
|---|---|-----------|-----------|-----------|
| 6 | 0 | -1.829099 | 0.187503  | -0.276953 |
| 6 | 0 | -2.958411 | 0.669274  | 0.469854  |
| 6 | 0 | -1.315012 | 0.993214  | -1.326867 |
| 6 | 0 | -3.570554 | 1.891113  | 0.085199  |
| 6 | 0 | -1.928925 | 2.182768  | -1.668163 |
| 6 | 0 | -3.051235 | 2.647538  | -0.945195 |
| 6 | 0 | -1.215648 | -1.033989 | 0.146155  |
| 6 | 0 | -3.496329 | -0.123168 | 1.517179  |

|    |   |           |           |           |
|----|---|-----------|-----------|-----------|
| 6  | 0 | -1.757852 | -1.774718 | 1.186812  |
| 6  | 0 | -2.897870 | -1.312089 | 1.880829  |
| 1  | 0 | -0.461404 | 0.634971  | -1.889146 |
| 1  | 0 | -4.433771 | 2.239196  | 0.642804  |
| 1  | 0 | -1.528634 | 2.778569  | -2.480011 |
| 1  | 0 | -3.522858 | 3.582622  | -1.223244 |
| 34 | 0 | 0.295806  | -1.766768 | -0.777048 |
| 1  | 0 | -4.364471 | 0.242423  | 2.055796  |
| 1  | 0 | -1.275665 | -2.697535 | 1.486506  |
| 1  | 0 | -3.308718 | -1.906424 | 2.688420  |
| 6  | 0 | 1.673554  | -0.578486 | -0.150526 |
| 6  | 0 | 1.433361  | 0.475391  | 0.737576  |
| 6  | 0 | 2.963305  | -0.764096 | -0.666802 |
| 6  | 0 | 2.483310  | 1.303828  | 1.134626  |
| 6  | 0 | 4.007400  | 0.066040  | -0.263760 |
| 6  | 0 | 3.776965  | 1.130930  | 0.621043  |
| 1  | 0 | 0.444150  | 0.633852  | 1.148650  |
| 1  | 0 | 3.162669  | -1.571910 | -1.363363 |
| 1  | 0 | 2.288986  | 2.113853  | 1.830329  |
| 1  | 0 | 5.003974  | -0.093373 | -0.662354 |
| 7  | 0 | 4.841604  | 1.927870  | 1.074604  |
| 1  | 0 | 4.550156  | 2.848841  | 1.371373  |
| 1  | 0 | 5.595194  | 2.003618  | 0.405609  |

**2b' (B<sub>0</sub>):** MP2 = -3070.2784431 a.u.

|    |   |           |           |           |
|----|---|-----------|-----------|-----------|
| 6  | 0 | 0.962021  | -2.120816 | 0.000000  |
| 6  | 0 | 2.375362  | -2.378306 | 0.000000  |
| 6  | 0 | 0.070924  | -3.226899 | 0.000000  |
| 6  | 0 | 2.830174  | -3.722690 | 0.000000  |
| 6  | 0 | 0.548300  | -4.523476 | 0.000000  |
| 6  | 0 | 1.938440  | -4.775859 | 0.000000  |
| 6  | 0 | 0.521123  | -0.761515 | 0.000000  |
| 6  | 0 | 3.287803  | -1.292125 | 0.000000  |
| 6  | 0 | 1.436612  | 0.277590  | 0.000000  |
| 6  | 0 | 2.823006  | 0.006523  | 0.000000  |
| 1  | 0 | -0.999679 | -3.056198 | 0.000000  |
| 1  | 0 | 3.899262  | -3.908740 | 0.000000  |
| 1  | 0 | -0.149758 | -5.352283 | 0.000000  |
| 1  | 0 | 2.302080  | -5.796537 | 0.000000  |
| 34 | 0 | -1.381262 | -0.432880 | 0.000000  |
| 1  | 0 | 4.352623  | -1.499392 | 0.000000  |
| 1  | 0 | 1.093106  | 1.304625  | 0.000000  |
| 1  | 0 | 3.521691  | 0.835403  | 0.000000  |
| 6  | 0 | -1.362570 | 1.476246  | 0.000000  |
| 6  | 0 | -1.375184 | 2.183262  | 1.211213  |
| 6  | 0 | -1.375184 | 2.183262  | -1.211213 |
| 6  | 0 | -1.375184 | 3.576416  | 1.209021  |
| 6  | 0 | -1.375184 | 3.576416  | -1.209021 |
| 6  | 0 | -1.397355 | 4.291564  | 0.000000  |
| 1  | 0 | -1.367182 | 1.641081  | 2.149370  |
| 1  | 0 | -1.367182 | 1.641081  | -2.149370 |
| 1  | 0 | -1.381046 | 4.117425  | 2.149496  |
| 1  | 0 | -1.381046 | 4.117425  | -2.149496 |
| 7  | 0 | -1.332899 | 5.688793  | 0.000000  |
| 1  | 0 | -1.714143 | 6.117457  | -0.831056 |
| 1  | 0 | -1.714143 | 6.117457  | 0.831056  |

**2c (A):** MP2 = -3054.2633367 a.u.

|   |   |           |           |           |
|---|---|-----------|-----------|-----------|
| 6 | 0 | -1.713960 | 0.304463  | -0.284775 |
| 6 | 0 | -2.807434 | 0.892225  | 0.439231  |
| 6 | 0 | -1.046493 | 1.089595  | -1.260833 |
| 6 | 0 | -3.224718 | 2.208755  | 0.112123  |
| 6 | 0 | -1.473633 | 2.371991  | -1.548152 |
| 6 | 0 | -2.555522 | 2.945887  | -0.843314 |
| 6 | 0 | -1.300814 | -1.015259 | 0.080885  |
| 6 | 0 | -3.509265 | 0.120011  | 1.401717  |
| 6 | 0 | -1.998384 | -1.735575 | 1.040072  |
| 6 | 0 | -3.105570 | -1.163453 | 1.705832  |
| 1 | 0 | -0.221796 | 0.654876  | -1.810637 |
| 1 | 0 | -4.060629 | 2.639361  | 0.653518  |
| 1 | 0 | -0.956959 | 2.951618  | -2.304090 |
| 1 | 0 | -2.879301 | 3.953051  | -1.077556 |

|    |   |           |           |           |
|----|---|-----------|-----------|-----------|
| 34 | 0 | 0.170201  | -1.888118 | -0.790227 |
| 1  | 0 | -4.347852 | 0.570655  | 1.922358  |
| 1  | 0 | -1.663288 | -2.732318 | 1.302152  |
| 1  | 0 | -3.640257 | -1.743922 | 2.448462  |
| 6  | 0 | 1.572154  | -0.724031 | -0.178615 |
| 6  | 0 | 1.608522  | -0.275222 | 1.147487  |
| 6  | 0 | 2.579283  | -0.342843 | -1.073593 |
| 6  | 0 | 2.644795  | 0.560858  | 1.563333  |
| 6  | 0 | 3.623216  | 0.474209  | -0.633416 |
| 6  | 0 | 3.670777  | 0.942681  | 0.686038  |
| 1  | 0 | 0.833627  | -0.576399 | 1.843505  |
| 1  | 0 | 2.544343  | -0.678042 | -2.104489 |
| 1  | 0 | 2.666027  | 0.908067  | 2.591435  |
| 1  | 0 | 4.404468  | 0.759871  | -1.330362 |
| 6  | 0 | 4.767159  | 1.870418  | 1.139465  |
| 1  | 0 | 4.474396  | 2.914987  | 1.017046  |
| 1  | 0 | 5.001462  | 1.714328  | 2.192343  |
| 1  | 0 | 5.678241  | 1.711630  | 0.563117  |

**2c (B')**: MP2 = -3054.2611318 a.u.

|    |   |           |           |           |
|----|---|-----------|-----------|-----------|
| 6  | 0 | 2.332610  | 0.020744  | -0.000073 |
| 6  | 0 | 3.136408  | 1.211374  | -0.000087 |
| 6  | 0 | 2.987232  | -1.239732 | -0.000120 |
| 6  | 0 | 4.550209  | 1.087576  | -0.000147 |
| 6  | 0 | 4.366336  | -1.323681 | -0.000178 |
| 6  | 0 | 5.156134  | -0.152235 | -0.000192 |
| 6  | 0 | 0.910649  | 0.163970  | -0.000011 |
| 6  | 0 | 2.508892  | 2.483595  | -0.000042 |
| 6  | 0 | 0.327259  | 1.420064  | 0.000033  |
| 6  | 0 | 1.133095  | 2.580363  | 0.000017  |
| 1  | 0 | 2.401124  | -2.151776 | -0.000111 |
| 1  | 0 | 5.150165  | 1.991752  | -0.000157 |
| 1  | 0 | 4.844614  | -2.295988 | -0.000214 |
| 1  | 0 | 6.236862  | -0.229519 | -0.000237 |
| 34 | 0 | -0.150739 | -1.447905 | 0.000013  |
| 1  | 0 | 3.126853  | 3.375135  | -0.000053 |
| 1  | 0 | -0.750911 | 1.520071  | 0.000081  |
| 1  | 0 | 0.655202  | 3.553378  | 0.000052  |
| 6  | 0 | -1.894500 | -0.660937 | 0.000059  |
| 6  | 0 | -2.538191 | -0.381355 | 1.213747  |
| 6  | 0 | -2.538242 | -0.381325 | -1.213598 |
| 6  | 0 | -3.814941 | 0.183083  | 1.204643  |
| 6  | 0 | -3.814987 | 0.183115  | -1.204427 |
| 6  | 0 | -4.470760 | 0.474988  | 0.000126  |
| 1  | 0 | -2.036720 | -0.597347 | 2.149731  |
| 1  | 0 | -2.036809 | -0.597294 | -2.149607 |
| 1  | 0 | -4.306804 | 0.402759  | 2.146569  |
| 1  | 0 | -4.306887 | 0.402818  | -2.146329 |
| 6  | 0 | -5.864886 | 1.044592  | 0.000148  |
| 1  | 0 | -6.612114 | 0.248848  | -0.000277 |
| 1  | 0 | -6.036812 | 1.660025  | 0.882769  |
| 1  | 0 | -6.036558 | 1.660718  | -0.882039 |

**2c (A<sub>o</sub>)**: MP2 = -3054.2620552 a.u.

|    |   |           |           |           |
|----|---|-----------|-----------|-----------|
| 6  | 0 | -1.841097 | 0.191975  | -0.272463 |
| 6  | 0 | -2.963100 | 0.680537  | 0.481072  |
| 6  | 0 | -1.335246 | 0.989639  | -1.332471 |
| 6  | 0 | -3.576836 | 1.900607  | 0.093495  |
| 6  | 0 | -1.950333 | 2.177856  | -1.676297 |
| 6  | 0 | -3.065497 | 2.649153  | -0.946590 |
| 6  | 0 | -1.225787 | -1.026965 | 0.154857  |
| 6  | 0 | -3.492504 | -0.103566 | 1.538927  |
| 6  | 0 | -1.759388 | -1.759894 | 1.205433  |
| 6  | 0 | -2.892452 | -1.290610 | 1.906185  |
| 1  | 0 | -0.487247 | 0.626855  | -1.900333 |
| 1  | 0 | -4.434404 | 2.253918  | 0.656448  |
| 1  | 0 | -1.556094 | 2.767666  | -2.495386 |
| 1  | 0 | -3.537832 | 3.583259  | -1.226559 |
| 34 | 0 | 0.276617  | -1.768898 | -0.775988 |
| 1  | 0 | -4.355340 | 0.267125  | 2.082523  |
| 1  | 0 | -1.276140 | -2.681507 | 1.507192  |
| 1  | 0 | -3.297023 | -1.878468 | 2.721615  |

|   |   |          |           |           |
|---|---|----------|-----------|-----------|
| 6 | 0 | 1.664254 | -0.584836 | -0.167116 |
| 6 | 0 | 1.433082 | 0.473681  | 0.718037  |
| 6 | 0 | 2.953538 | -0.801112 | -0.673432 |
| 6 | 0 | 2.496963 | 1.293231  | 1.102333  |
| 6 | 0 | 4.003161 | 0.027173  | -0.276283 |
| 6 | 0 | 3.794086 | 1.089270  | 0.614658  |
| 1 | 0 | 0.443267 | 0.647096  | 1.121581  |
| 1 | 0 | 3.139968 | -1.618145 | -1.362902 |
| 1 | 0 | 2.309932 | 2.107077  | 1.795746  |
| 1 | 0 | 4.998849 | -0.155378 | -0.667524 |
| 6 | 0 | 4.923076 | 2.007273  | 1.003217  |
| 1 | 0 | 5.021876 | 2.833085  | 0.295964  |
| 1 | 0 | 4.756520 | 2.435913  | 1.991239  |
| 1 | 0 | 5.873176 | 1.473563  | 1.022637  |

**2c (B<sub>0</sub>):** MP2 = -3054.2611318 a.u.

|    |   |           |           |           |
|----|---|-----------|-----------|-----------|
| 6  | 0 | 0.962128  | -2.125045 | 0.000000  |
| 6  | 0 | 2.376095  | -2.378799 | 0.000000  |
| 6  | 0 | 0.073967  | -3.233423 | 0.000000  |
| 6  | 0 | 2.834514  | -3.721933 | 0.000000  |
| 6  | 0 | 0.554803  | -4.528711 | 0.000000  |
| 6  | 0 | 1.945563  | -4.777416 | 0.000000  |
| 6  | 0 | 0.518179  | -0.766593 | 0.000000  |
| 6  | 0 | 3.285958  | -1.290464 | 0.000000  |
| 6  | 0 | 1.431134  | 0.274863  | 0.000000  |
| 6  | 0 | 2.818184  | 0.006982  | 0.000000  |
| 1  | 0 | -0.997182 | -3.066130 | 0.000000  |
| 1  | 0 | 3.904065  | -3.905073 | 0.000000  |
| 1  | 0 | -0.141097 | -5.359286 | 0.000000  |
| 1  | 0 | 2.311851  | -5.797112 | 0.000000  |
| 34 | 0 | -1.385214 | -0.447567 | 0.000000  |
| 1  | 0 | 4.351233  | -1.495180 | 0.000000  |
| 1  | 0 | 1.086662  | 1.301406  | 0.000000  |
| 1  | 0 | 3.514887  | 0.837491  | 0.000000  |
| 6  | 0 | -1.370506 | 1.465494  | 0.000000  |
| 6  | 0 | -1.375063 | 2.167295  | 1.213673  |
| 6  | 0 | -1.375063 | 2.167295  | -1.213673 |
| 6  | 0 | -1.375063 | 3.563245  | 1.204535  |
| 6  | 0 | -1.375063 | 3.563245  | -1.204535 |
| 6  | 0 | -1.373263 | 4.281064  | 0.000000  |
| 1  | 0 | -1.369845 | 1.621333  | 2.149669  |
| 1  | 0 | -1.369845 | 1.621333  | -2.149669 |
| 1  | 0 | -1.373019 | 4.101953  | 2.146449  |
| 1  | 0 | -1.373019 | 4.101953  | -2.146449 |
| 6  | 0 | -1.415998 | 5.786457  | 0.000000  |
| 1  | 0 | -2.445926 | 6.148129  | 0.000000  |
| 1  | 0 | -0.922265 | 6.192570  | 0.882404  |
| 1  | 0 | -0.922265 | 6.192570  | -0.882404 |

**2f (A):** MP2 = -3474.0981486 a.u.

|    |   |           |           |           |
|----|---|-----------|-----------|-----------|
| 6  | 0 | -1.954696 | 0.382629  | -0.279635 |
| 6  | 0 | -2.940082 | 1.133485  | 0.448736  |
| 6  | 0 | -1.270436 | 1.018263  | -1.348390 |
| 6  | 0 | -3.243171 | 2.457513  | 0.037109  |
| 6  | 0 | -1.584244 | 2.312472  | -1.717204 |
| 6  | 0 | -2.560514 | 3.046928  | -1.007197 |
| 6  | 0 | -1.652804 | -0.939813 | 0.173924  |
| 6  | 0 | -3.657232 | 0.513177  | 1.505287  |
| 6  | 0 | -2.360120 | -1.510197 | 1.222675  |
| 6  | 0 | -3.364964 | -0.777782 | 1.893679  |
| 1  | 0 | -0.528887 | 0.459112  | -1.904395 |
| 1  | 0 | -3.998964 | 3.012199  | 0.583191  |
| 1  | 0 | -1.057756 | 2.776688  | -2.542746 |
| 1  | 0 | -2.795296 | 4.061711  | -1.305524 |
| 34 | 0 | -0.327039 | -2.021998 | -0.694474 |
| 1  | 0 | -4.415413 | 1.086228  | 2.028770  |
| 1  | 0 | -2.109713 | -2.512937 | 1.548657  |
| 1  | 0 | -3.910170 | -1.241429 | 2.707273  |
| 6  | 0 | 1.214797  | -0.973718 | -0.232909 |
| 6  | 0 | 1.334823  | -0.382342 | 1.031276  |
| 6  | 0 | 2.235814  | -0.815298 | -1.178868 |
| 6  | 0 | 2.467190  | 0.368363  | 1.346486  |



|    |   |          |           |           |
|----|---|----------|-----------|-----------|
| 6  | 0 | 3.382136 | -0.085515 | -0.858332 |
| 6  | 0 | 3.485771 | 0.509307  | 0.400300  |
| 1  | 0 | 0.547633 | -0.506330 | 1.766116  |
| 1  | 0 | 2.136780 | -1.255505 | -2.164818 |
| 1  | 0 | 2.564936 | 0.833919  | 2.319087  |
| 1  | 0 | 4.176278 | 0.039345  | -1.583442 |
| 17 | 0 | 4.900959 | 1.438242  | 0.796372  |

**2f (B')**: MP2 = -3474.0965958 a.u.

|    |   |           |           |           |
|----|---|-----------|-----------|-----------|
| 6  | 0 | 2.234988  | 0.127141  | -0.137122 |
| 6  | 0 | 3.153103  | 0.738587  | 0.786549  |
| 6  | 0 | 2.241436  | 0.567652  | -1.488415 |
| 6  | 0 | 3.990593  | 1.792260  | 0.334728  |
| 6  | 0 | 3.075290  | 1.591398  | -1.895296 |
| 6  | 0 | 3.965203  | 2.201692  | -0.982365 |
| 6  | 0 | 1.396986  | -0.924057 | 0.350209  |
| 6  | 0 | 3.165048  | 0.325777  | 2.143549  |
| 6  | 0 | 1.446418  | -1.313603 | 1.681067  |
| 6  | 0 | 2.340168  | -0.691319 | 2.579255  |
| 1  | 0 | 1.566594  | 0.098466  | -2.193869 |
| 1  | 0 | 4.671813  | 2.254325  | 1.041535  |
| 1  | 0 | 3.061014  | 1.914209  | -2.929626 |
| 1  | 0 | 4.613298  | 3.003917  | -1.314497 |
| 34 | 0 | 0.139079  | -1.820180 | -0.799984 |
| 1  | 0 | 3.855912  | 0.805361  | 2.829098  |
| 1  | 0 | 0.800063  | -2.113183 | 2.023303  |
| 1  | 0 | 2.361137  | -1.006323 | 3.615877  |
| 6  | 0 | -1.394564 | -0.737968 | -0.386601 |
| 6  | 0 | -1.314880 | 0.661635  | -0.376158 |
| 6  | 0 | -2.616967 | -1.370864 | -0.125733 |
| 6  | 0 | -2.448549 | 1.422720  | -0.091536 |
| 6  | 0 | -3.758998 | -0.610778 | 0.134838  |
| 6  | 0 | -3.665309 | 0.781666  | 0.155620  |
| 1  | 0 | -0.373644 | 1.156368  | -0.584359 |
| 1  | 0 | -2.676185 | -2.453004 | -0.114748 |
| 1  | 0 | -2.394099 | 2.503922  | -0.074749 |
| 1  | 0 | -4.706841 | -1.093031 | 0.337383  |
| 17 | 0 | -5.080443 | 1.731969  | 0.498152  |

**2f (A<sub>0</sub>)**: MP2 = -3474.0970925 a.u.

|    |   |           |           |           |
|----|---|-----------|-----------|-----------|
| 6  | 0 | -2.091570 | 0.272750  | -0.261484 |
| 6  | 0 | -3.122875 | 0.925803  | 0.497118  |
| 6  | 0 | -1.557633 | 0.938148  | -1.396359 |
| 6  | 0 | -3.627990 | 2.173111  | 0.044917  |
| 6  | 0 | -2.065239 | 2.157096  | -1.802506 |
| 6  | 0 | -3.092258 | 2.790763  | -1.066418 |
| 6  | 0 | -1.582649 | -0.969624 | 0.232700  |
| 6  | 0 | -3.678923 | 0.276013  | 1.629748  |
| 6  | 0 | -2.137483 | -1.569516 | 1.354247  |
| 6  | 0 | -3.184838 | -0.938103 | 2.060893  |
| 1  | 0 | -0.778877 | 0.450762  | -1.970204 |
| 1  | 0 | -4.418761 | 2.651512  | 0.613094  |
| 1  | 0 | -1.652237 | 2.644570  | -2.677654 |
| 1  | 0 | -3.480270 | 3.747298  | -1.395620 |
| 34 | 0 | -0.204211 | -1.924351 | -0.695848 |
| 1  | 0 | -4.474428 | 0.770746  | 2.177186  |
| 1  | 0 | -1.735510 | -2.512653 | 1.704775  |
| 1  | 0 | -3.608536 | -1.422605 | 2.932531  |
| 6  | 0 | 1.315818  | -0.849174 | -0.222708 |
| 6  | 0 | 1.225232  | 0.285268  | 0.592273  |
| 6  | 0 | 2.555134  | -1.222320 | -0.762743 |
| 6  | 0 | 2.371497  | 1.026968  | 0.884859  |
| 6  | 0 | 3.701256  | -0.483909 | -0.470177 |
| 6  | 0 | 3.601075  | 0.643806  | 0.347643  |
| 1  | 0 | 0.274959  | 0.583107  | 1.017096  |
| 1  | 0 | 2.633096  | -2.095350 | -1.402008 |
| 1  | 0 | 2.307543  | 1.903187  | 1.517738  |
| 1  | 0 | 4.660133  | -0.772137 | -0.881820 |
| 17 | 0 | 5.026162  | 1.572767  | 0.708923  |

**2f (B<sub>0</sub>)**: MP2 = -3474.0953860 a.u.

|   |   |           |           |          |
|---|---|-----------|-----------|----------|
| 6 | 0 | -1.021198 | -2.435347 | 0.000000 |
|---|---|-----------|-----------|----------|

|    |   |           |           |           |
|----|---|-----------|-----------|-----------|
| 6  | 0 | -2.433502 | -2.698029 | 0.000000  |
| 6  | 0 | -0.125676 | -3.537745 | 0.000000  |
| 6  | 0 | -2.883235 | -4.044061 | 0.000000  |
| 6  | 0 | -0.598194 | -4.836071 | 0.000000  |
| 6  | 0 | -1.987318 | -5.093618 | 0.000000  |
| 6  | 0 | -0.587421 | -1.073853 | 0.000000  |
| 6  | 0 | -3.350460 | -1.615625 | 0.000000  |
| 6  | 0 | -1.506503 | -0.038033 | 0.000000  |
| 6  | 0 | -2.891856 | -0.315012 | 0.000000  |
| 1  | 0 | 0.944587  | -3.364443 | 0.000000  |
| 1  | 0 | -3.951507 | -4.234138 | 0.000000  |
| 1  | 0 | 0.103002  | -5.662116 | 0.000000  |
| 1  | 0 | -2.346903 | -6.115641 | 0.000000  |
| 34 | 0 | 1.315265  | -0.746634 | 0.000000  |
| 1  | 0 | -4.414303 | -1.827343 | 0.000000  |
| 1  | 0 | -1.170411 | 0.991195  | 0.000000  |
| 1  | 0 | -3.593892 | 0.510862  | 0.000000  |
| 6  | 0 | 1.290635  | 1.165451  | 0.000000  |
| 6  | 0 | 1.297835  | 1.867294  | 1.214168  |
| 6  | 0 | 1.297835  | 1.867294  | -1.214168 |
| 6  | 0 | 1.297835  | 3.262914  | 1.216443  |
| 6  | 0 | 1.297835  | 3.262914  | -1.216443 |
| 6  | 0 | 1.299629  | 3.950155  | 0.000000  |
| 1  | 0 | 1.295639  | 1.322325  | 2.150435  |
| 1  | 0 | 1.295639  | 1.322325  | -2.150435 |
| 1  | 0 | 1.302201  | 3.813629  | 2.148426  |
| 1  | 0 | 1.302201  | 3.813629  | -2.148426 |
| 17 | 0 | 1.302194  | 5.687264  | 0.000000  |

**2j (A):** MP2 = -3219.0709093 a.u.

|    |   |           |           |           |
|----|---|-----------|-----------|-----------|
| 6  | 0 | -2.156453 | 0.393653  | -0.305924 |
| 6  | 0 | -3.100234 | 1.231713  | 0.381227  |
| 6  | 0 | -1.477261 | 0.920025  | -1.435614 |
| 6  | 0 | -3.373472 | 2.527382  | -0.129706 |
| 6  | 0 | -1.760943 | 2.189678  | -1.901254 |
| 6  | 0 | -2.697572 | 3.009181  | -1.231943 |
| 6  | 0 | -1.881529 | -0.894870 | 0.250657  |
| 6  | 0 | -3.808815 | 0.721630  | 1.500683  |
| 6  | 0 | -2.578025 | -1.357132 | 1.358157  |
| 6  | 0 | -3.543893 | -0.541208 | 1.988667  |
| 1  | 0 | -0.768934 | 0.293359  | -1.962681 |
| 1  | 0 | -4.098758 | 3.147955  | 0.385800  |
| 1  | 0 | -1.240459 | 2.569461  | -2.772418 |
| 1  | 0 | -2.908503 | 4.003789  | -1.606130 |
| 34 | 0 | -0.614937 | -2.084626 | -0.560505 |
| 1  | 0 | -4.536701 | 1.358638  | 1.992138  |
| 1  | 0 | -2.347971 | -2.336786 | 1.760269  |
| 1  | 0 | -4.081899 | -0.919484 | 2.849704  |
| 6  | 0 | 0.979093  | -1.082787 | -0.196695 |
| 6  | 0 | 1.079258  | -0.244488 | 0.922803  |
| 6  | 0 | 2.064143  | -1.212868 | -1.076223 |
| 6  | 0 | 2.254760  | 0.464080  | 1.163803  |
| 6  | 0 | 3.253099  | -0.526431 | -0.833821 |
| 6  | 0 | 3.322040  | 0.308442  | 0.280085  |
| 1  | 0 | 0.243096  | -0.149711 | 1.605439  |
| 1  | 0 | 1.979655  | -1.846534 | -1.951967 |
| 1  | 0 | 2.355485  | 1.119226  | 2.017609  |
| 1  | 0 | 4.102634  | -0.611164 | -1.496565 |
| 7  | 0 | 4.564041  | 1.050305  | 0.532343  |
| 8  | 0 | 4.600487  | 1.789512  | 1.530990  |
| 8  | 0 | 5.501605  | 0.893037  | -0.268474 |

**2j (B'):** MP2 = -3219.0709093 a.u.

|   |   |           |           |           |
|---|---|-----------|-----------|-----------|
| 6 | 0 | -2.156463 | 0.393661  | -0.305857 |
| 6 | 0 | -3.100225 | 1.231695  | 0.381354  |
| 6 | 0 | -1.477308 | 0.920074  | -1.435551 |
| 6 | 0 | -3.373463 | 2.527391  | -0.129511 |
| 6 | 0 | -1.760993 | 2.189751  | -1.901125 |
| 6 | 0 | -2.697593 | 3.009232  | -1.231747 |
| 6 | 0 | -1.881529 | -0.894886 | 0.250662  |
| 6 | 0 | -3.808774 | 0.721569  | 1.500809  |
| 6 | 0 | -2.577997 | -1.357193 | 1.358161  |

|    |   |           |           |           |
|----|---|-----------|-----------|-----------|
| 6  | 0 | -3.543849 | -0.541293 | 1.988729  |
| 1  | 0 | -0.769005 | 0.293422  | -1.962669 |
| 1  | 0 | -4.098728 | 3.147948  | 0.386045  |
| 1  | 0 | -1.240537 | 2.569565  | -2.772292 |
| 1  | 0 | -2.908522 | 4.003862  | -1.605881 |
| 34 | 0 | -0.614948 | -2.084604 | -0.560573 |
| 1  | 0 | -4.536647 | 1.358558  | 1.992309  |
| 1  | 0 | -2.347933 | -2.336863 | 1.760228  |
| 1  | 0 | -4.081834 | -0.919603 | 2.849764  |
| 6  | 0 | 0.979085  | -1.082774 | -0.196760 |
| 6  | 0 | 2.064131  | -1.212860 | -1.076293 |
| 6  | 0 | 1.079263  | -0.244480 | 0.922741  |
| 6  | 0 | 3.253092  | -0.526431 | -0.833895 |
| 6  | 0 | 2.254771  | 0.464078  | 1.163738  |
| 6  | 0 | 3.322046  | 0.308436  | 0.280014  |
| 1  | 0 | 1.979635  | -1.846523 | -1.952039 |
| 1  | 0 | 0.243104  | -0.149697 | 1.605380  |
| 1  | 0 | 4.102624  | -0.611169 | -1.496643 |
| 1  | 0 | 2.355505  | 1.119220  | 2.017546  |
| 7  | 0 | 4.564055  | 1.050286  | 0.532272  |
| 8  | 0 | 5.501615  | 0.893013  | -0.268550 |
| 8  | 0 | 4.600514  | 1.789485  | 1.530924  |

**2j (A<sub>o</sub>):** MP2 = -3219.0703265 a.u.

|    |   |           |           |           |
|----|---|-----------|-----------|-----------|
| 6  | 0 | -2.278983 | 0.301083  | -0.275000 |
| 6  | 0 | -3.263206 | 1.050633  | 0.456583  |
| 6  | 0 | -1.735316 | 0.866068  | -1.458667 |
| 6  | 0 | -3.715731 | 2.290453  | -0.066293 |
| 6  | 0 | -2.191034 | 2.080550  | -1.933855 |
| 6  | 0 | -3.171794 | 2.809351  | -1.223196 |
| 6  | 0 | -1.821351 | -0.929732 | 0.292079  |
| 6  | 0 | -3.828090 | 0.502106  | 1.637427  |
| 6  | 0 | -2.382572 | -1.430792 | 1.457972  |
| 6  | 0 | -3.385126 | -0.704952 | 2.138343  |
| 1  | 0 | -0.993357 | 0.305433  | -2.014230 |
| 1  | 0 | -4.471365 | 2.842360  | 0.482571  |
| 1  | 0 | -1.772239 | 2.490593  | -2.845148 |
| 1  | 0 | -3.518834 | 3.761419  | -1.606426 |
| 34 | 0 | -0.505801 | -2.007055 | -0.592826 |
| 1  | 0 | -4.588414 | 1.069063  | 2.164309  |
| 1  | 0 | -2.020062 | -2.368430 | 1.862231  |
| 1  | 0 | -3.815220 | -1.111527 | 3.045849  |
| 6  | 0 | 1.068182  | -0.983148 | -0.209872 |
| 6  | 0 | 1.043734  | 0.204343  | 0.534300  |
| 6  | 0 | 2.280618  | -1.452708 | -0.740440 |
| 6  | 0 | 2.225081  | 0.907789  | 0.767096  |
| 6  | 0 | 3.466421  | -0.759216 | -0.512253 |
| 6  | 0 | 3.415156  | 0.417710  | 0.233927  |
| 1  | 0 | 0.113437  | 0.571238  | 0.948577  |
| 1  | 0 | 2.301977  | -2.367352 | -1.323055 |
| 1  | 0 | 2.230983  | 1.823742  | 1.341074  |
| 1  | 0 | 4.410572  | -1.105937 | -0.907729 |
| 7  | 0 | 4.658704  | 1.158811  | 0.474604  |
| 8  | 0 | 4.586103  | 2.206105  | 1.140328  |
| 8  | 0 | 5.708008  | 0.693942  | -0.003213 |

**2j (B<sub>o</sub>):** MP2 = -3219.0667322 a.u.

|    |   |           |           |          |
|----|---|-----------|-----------|----------|
| 6  | 0 | -1.063485 | -2.659383 | 0.000000 |
| 6  | 0 | -2.474957 | -2.926407 | 0.000000 |
| 6  | 0 | -0.164226 | -3.758668 | 0.000000 |
| 6  | 0 | -2.920324 | -4.273862 | 0.000000 |
| 6  | 0 | -0.632558 | -5.058485 | 0.000000 |
| 6  | 0 | -2.020844 | -5.320338 | 0.000000 |
| 6  | 0 | -0.635499 | -1.296229 | 0.000000 |
| 6  | 0 | -3.395596 | -1.847094 | 0.000000 |
| 6  | 0 | -1.557474 | -0.263018 | 0.000000 |
| 6  | 0 | -2.941928 | -0.544887 | 0.000000 |
| 1  | 0 | 0.905669  | -3.582730 | 0.000000 |
| 1  | 0 | -3.987901 | -4.467401 | 0.000000 |
| 1  | 0 | 0.071263  | -5.882230 | 0.000000 |
| 1  | 0 | -2.377028 | -6.343500 | 0.000000 |
| 34 | 0 | 1.267479  | -0.967882 | 0.000000 |

|   |   |           |           |           |
|---|---|-----------|-----------|-----------|
| 1 | 0 | -4.458650 | -2.062416 | 0.000000  |
| 1 | 0 | -1.226708 | 0.767805  | 0.000000  |
| 1 | 0 | -3.646729 | 0.278523  | 0.000000  |
| 6 | 0 | 1.237324  | 0.945049  | 0.000000  |
| 6 | 0 | 1.245130  | 1.645498  | 1.216298  |
| 6 | 0 | 1.245130  | 1.645498  | -1.216298 |
| 6 | 0 | 1.245130  | 3.040525  | 1.223725  |
| 6 | 0 | 1.245130  | 3.040525  | -1.223725 |
| 6 | 0 | 1.247602  | 3.708513  | 0.000000  |
| 1 | 0 | 1.242973  | 1.096541  | 2.150001  |
| 1 | 0 | 1.242973  | 1.096541  | -2.150001 |
| 1 | 0 | 1.249242  | 3.605526  | 2.145043  |
| 1 | 0 | 1.249242  | 3.605526  | -2.145043 |
| 7 | 0 | 1.247608  | 5.180452  | 0.000000  |
| 8 | 0 | 1.247299  | 5.754326  | 1.102064  |
| 8 | 0 | 1.247299  | 5.754326  | -1.102064 |

**3a (A):** MP2 = -1012.6770442 a.u.

|    |   |           |           |           |
|----|---|-----------|-----------|-----------|
| 6  | 0 | -1.325896 | 0.129770  | -0.371071 |
| 6  | 0 | -2.560510 | 0.234442  | 0.354265  |
| 6  | 0 | -0.733855 | 1.312490  | -0.885033 |
| 6  | 0 | -3.181189 | 1.504611  | 0.480381  |
| 6  | 0 | -1.362477 | 2.534338  | -0.738227 |
| 6  | 0 | -2.582674 | 2.637126  | -0.032832 |
| 6  | 0 | -0.709650 | -1.159427 | -0.468170 |
| 6  | 0 | -3.183393 | -0.939360 | 0.854752  |
| 6  | 0 | -1.338272 | -2.282862 | 0.051167  |
| 6  | 0 | -2.579426 | -2.171957 | 0.716097  |
| 1  | 0 | 0.198720  | 1.242314  | -1.429594 |
| 1  | 0 | -4.120906 | 1.574297  | 1.018193  |
| 1  | 0 | -0.901403 | 3.426279  | -1.145797 |
| 1  | 0 | -3.063013 | 3.602184  | 0.076580  |
| 16 | 0 | 0.816081  | -1.391867 | -1.341059 |
| 1  | 0 | -4.128682 | -0.846290 | 1.379215  |
| 1  | 0 | -0.848023 | -3.245533 | -0.035603 |
| 1  | 0 | -3.056359 | -3.062148 | 1.108800  |
| 6  | 0 | 1.953185  | -0.497826 | -0.307304 |
| 6  | 0 | 1.849233  | -0.520326 | 1.090601  |
| 6  | 0 | 2.996278  | 0.206963  | -0.924608 |
| 6  | 0 | 2.781640  | 0.174135  | 1.862107  |
| 6  | 0 | 3.940020  | 0.875531  | -0.141304 |
| 6  | 0 | 3.830724  | 0.868904  | 1.251499  |
| 1  | 0 | 1.044232  | -1.072903 | 1.561011  |
| 1  | 0 | 3.059557  | 0.231742  | -2.006913 |
| 1  | 0 | 2.694567  | 0.162913  | 2.942252  |
| 1  | 0 | 4.746358  | 1.417310  | -0.621368 |
| 1  | 0 | 4.555216  | 1.400384  | 1.856248  |

**3a (TS-AB'):** MP2 = -1012.6743666 a.u.

|    |   |           |           |           |
|----|---|-----------|-----------|-----------|
| 6  | 0 | 1.754155  | -0.215243 | -0.193949 |
| 6  | 0 | 2.675865  | 0.839773  | 0.129132  |
| 6  | 0 | 2.175375  | -1.561665 | -0.024762 |
| 6  | 0 | 3.997400  | 0.502542  | 0.523721  |
| 6  | 0 | 3.466753  | -1.852533 | 0.369596  |
| 6  | 0 | 4.383540  | -0.815160 | 0.655460  |
| 6  | 0 | 0.433931  | 0.147317  | -0.605549 |
| 6  | 0 | 2.271525  | 2.192209  | -0.002705 |
| 6  | 0 | 0.074462  | 1.482362  | -0.731414 |
| 6  | 0 | 0.985024  | 2.504573  | -0.396066 |
| 1  | 0 | 1.477047  | -2.362972 | -0.231373 |
| 1  | 0 | 4.692388  | 1.304316  | 0.750557  |
| 1  | 0 | 3.770442  | -2.885880 | 0.488767  |
| 1  | 0 | 5.394143  | -1.057174 | 0.962305  |
| 16 | 0 | -0.725796 | -1.128033 | -1.051549 |
| 1  | 0 | 2.979037  | 2.977242  | 0.242457  |
| 1  | 0 | -0.926241 | 1.734540  | -1.063492 |
| 1  | 0 | 0.680877  | 3.540250  | -0.493586 |
| 6  | 0 | -2.186940 | -0.545385 | -0.230354 |
| 6  | 0 | -2.209228 | -0.395726 | 1.165616  |
| 6  | 0 | -3.337699 | -0.282206 | -0.985678 |
| 6  | 0 | -3.376966 | 0.034710  | 1.794217  |
| 6  | 0 | -4.510511 | 0.125202  | -0.342682 |

|   |   |           |           |           |
|---|---|-----------|-----------|-----------|
| 6 | 0 | -4.530665 | 0.290115  | 1.043774  |
| 1 | 0 | -1.316160 | -0.612348 | 1.740320  |
| 1 | 0 | -3.304338 | -0.392144 | -2.063201 |
| 1 | 0 | -3.392494 | 0.155893  | 2.870893  |
| 1 | 0 | -5.400260 | 0.326261  | -0.927376 |
| 1 | 0 | -5.437832 | 0.615229  | 1.538371  |

**3a (B')**: MP2 = -1012.6744674 a.u.

|    |   |           |           |           |
|----|---|-----------|-----------|-----------|
| 6  | 0 | 1.835097  | -0.211310 | -0.080038 |
| 6  | 0 | 2.727156  | 0.907645  | 0.036792  |
| 6  | 0 | 2.366937  | -1.522128 | 0.047764  |
| 6  | 0 | 4.117034  | 0.664566  | 0.190933  |
| 6  | 0 | 3.725100  | -1.721633 | 0.204391  |
| 6  | 0 | 4.607409  | -0.621356 | 0.290231  |
| 6  | 0 | 0.437753  | 0.049423  | -0.245476 |
| 6  | 0 | 2.218606  | 2.227257  | -0.072459 |
| 6  | 0 | -0.026087 | 1.352010  | -0.352520 |
| 6  | 0 | 0.865282  | 2.439843  | -0.235398 |
| 1  | 0 | 1.703128  | -2.376622 | -0.006059 |
| 1  | 0 | 4.787468  | 1.514704  | 0.262678  |
| 1  | 0 | 4.111970  | -2.729897 | 0.293375  |
| 1  | 0 | 5.670648  | -0.789927 | 0.413088  |
| 16 | 0 | -0.642845 | -1.355838 | -0.408467 |
| 1  | 0 | 2.903907  | 3.063859  | 0.011335  |
| 1  | 0 | -1.082450 | 1.538697  | -0.500289 |
| 1  | 0 | 0.478059  | 3.449041  | -0.315950 |
| 6  | 0 | -2.228575 | -0.635505 | -0.081245 |
| 6  | 0 | -3.112404 | -0.391495 | -1.142007 |
| 6  | 0 | -2.614282 | -0.353402 | 1.238843  |
| 6  | 0 | -4.379314 | 0.137509  | -0.879932 |
| 6  | 0 | -3.876171 | 0.186496  | 1.488708  |
| 6  | 0 | -4.760979 | 0.428381  | 0.432128  |
| 1  | 0 | -2.799422 | -0.611551 | -2.155680 |
| 1  | 0 | -1.923661 | -0.555170 | 2.049066  |
| 1  | 0 | -5.063197 | 0.324522  | -1.699157 |
| 1  | 0 | -4.173868 | 0.406964  | 2.506885  |
| 1  | 0 | -5.742425 | 0.840993  | 0.631896  |

**3a (B<sub>0</sub>)**: MP2 = -1012.6744034 a.u.

|    |   |           |           |           |
|----|---|-----------|-----------|-----------|
| 6  | 0 | -0.537956 | -1.781745 | 0.000000  |
| 6  | 0 | -1.923029 | -2.157723 | 0.000000  |
| 6  | 0 | 0.446678  | -2.805249 | 0.000000  |
| 6  | 0 | -2.260715 | -3.536170 | 0.000000  |
| 6  | 0 | 0.081362  | -4.137913 | 0.000000  |
| 6  | 0 | -1.281846 | -4.508865 | 0.000000  |
| 6  | 0 | -0.211437 | -0.387633 | 0.000000  |
| 6  | 0 | -2.925637 | -1.153866 | 0.000000  |
| 6  | 0 | -1.215144 | 0.568538  | 0.000000  |
| 6  | 0 | -2.572488 | 0.179119  | 0.000000  |
| 1  | 0 | 1.497463  | -2.540576 | 0.000000  |
| 1  | 0 | -3.309847 | -3.813215 | 0.000000  |
| 1  | 0 | 0.847846  | -4.903867 | 0.000000  |
| 1  | 0 | -1.556425 | -5.556998 | 0.000000  |
| 16 | 0 | 1.519016  | 0.029224  | 0.000000  |
| 1  | 0 | -3.968858 | -1.450857 | 0.000000  |
| 1  | 0 | -0.962429 | 1.620967  | 0.000000  |
| 1  | 0 | -3.338793 | 0.945787  | 0.000000  |
| 6  | 0 | 1.480597  | 1.800518  | 0.000000  |
| 6  | 0 | 1.485324  | 2.499617  | 1.216453  |
| 6  | 0 | 1.485324  | 2.499617  | -1.216453 |
| 6  | 0 | 1.485324  | 3.896034  | 1.211182  |
| 6  | 0 | 1.485324  | 3.896034  | -1.211182 |
| 6  | 0 | 1.486990  | 4.594472  | 0.000000  |
| 1  | 0 | 1.483553  | 1.945427  | 2.147467  |
| 1  | 0 | 1.483553  | 1.945427  | -2.147467 |
| 1  | 0 | 1.489032  | 4.436945  | 2.149910  |
| 1  | 0 | 1.489032  | 4.436945  | -2.149910 |
| 1  | 0 | 1.489583  | 5.677719  | 0.000000  |

**3b' (B')**: MP2 = 1067.8779173 a.u.

|   |   |          |           |           |
|---|---|----------|-----------|-----------|
| 6 | 0 | 2.242354 | -0.179698 | -0.021353 |
| 6 | 0 | 3.088157 | 0.979021  | 0.020311  |

|    |   |           |           |           |
|----|---|-----------|-----------|-----------|
| 6  | 0 | 2.846120  | -1.464883 | 0.008236  |
| 6  | 0 | 4.496231  | 0.801615  | 0.010479  |
| 6  | 0 | 4.221243  | -1.600603 | 0.008197  |
| 6  | 0 | 5.054896  | -0.460139 | 0.026523  |
| 6  | 0 | 0.823638  | 0.012082  | -0.010376 |
| 6  | 0 | 2.508648  | 2.273699  | -0.007779 |
| 6  | 0 | 0.289359  | 1.291048  | -0.028565 |
| 6  | 0 | 1.137260  | 2.419883  | -0.007798 |
| 1  | 0 | 2.222868  | -2.351115 | -0.006884 |
| 1  | 0 | 5.129980  | 1.682307  | 0.025971  |
| 1  | 0 | 4.662387  | -2.590282 | 0.022325  |
| 1  | 0 | 6.131989  | -0.578189 | 0.025848  |
| 16 | 0 | -0.188483 | -1.452552 | -0.023809 |
| 1  | 0 | 3.158281  | 3.142148  | 0.010764  |
| 1  | 0 | -0.784415 | 1.428484  | -0.028583 |
| 1  | 0 | 0.694997  | 3.409484  | -0.022266 |
| 6  | 0 | -1.825414 | -0.786834 | -0.008644 |
| 6  | 0 | -2.499054 | -0.536482 | -1.213658 |
| 6  | 0 | -2.481670 | -0.547455 | 1.208190  |
| 6  | 0 | -3.798810 | -0.037037 | -1.200344 |
| 6  | 0 | -3.781119 | -0.047362 | 1.217982  |
| 6  | 0 | -4.465339 | 0.194155  | 0.014723  |
| 1  | 0 | -1.993369 | -0.720592 | -2.154244 |
| 1  | 0 | -1.962769 | -0.740720 | 2.139687  |
| 1  | 0 | -4.312614 | 0.156218  | -2.136134 |
| 1  | 0 | -4.281340 | 0.137645  | 2.162758  |
| 7  | 0 | -5.746141 | 0.755815  | 0.026529  |
| 1  | 0 | -6.289261 | 0.557849  | -0.801446 |
| 1  | 0 | -6.277011 | 0.550837  | 0.860720  |

**3b'** ( $B_o$ ): MP2 = -1067.8778826 a.u.

|    |   |           |           |           |
|----|---|-----------|-----------|-----------|
| 6  | 0 | -0.636671 | -2.157546 | 0.000000  |
| 6  | 0 | -2.022455 | -2.531222 | 0.000000  |
| 6  | 0 | 0.346187  | -3.182861 | 0.000000  |
| 6  | 0 | -2.362419 | -3.909147 | 0.000000  |
| 6  | 0 | -0.021364 | -4.514917 | 0.000000  |
| 6  | 0 | -1.385250 | -4.883593 | 0.000000  |
| 6  | 0 | -0.306908 | -0.764330 | 0.000000  |
| 6  | 0 | -3.023052 | -1.525378 | 0.000000  |
| 6  | 0 | -1.308907 | 0.193563  | 0.000000  |
| 6  | 0 | -2.666982 | -0.192979 | 0.000000  |
| 1  | 0 | 1.397196  | -2.919195 | 0.000000  |
| 1  | 0 | -3.412056 | -4.184499 | 0.000000  |
| 1  | 0 | 0.743784  | -5.282276 | 0.000000  |
| 1  | 0 | -1.661688 | -5.931287 | 0.000000  |
| 16 | 0 | 1.423423  | -0.345342 | 0.000000  |
| 1  | 0 | -4.066915 | -1.820299 | 0.000000  |
| 1  | 0 | -1.051851 | 1.245144  | 0.000000  |
| 1  | 0 | -3.431849 | 0.575213  | 0.000000  |
| 6  | 0 | 1.389727  | 1.421518  | 0.000000  |
| 6  | 0 | 1.399850  | 2.130066  | 1.210968  |
| 6  | 0 | 1.399850  | 2.130066  | -1.210968 |
| 6  | 0 | 1.399850  | 3.522499  | 1.209207  |
| 6  | 0 | 1.399850  | 3.522499  | -1.209207 |
| 6  | 0 | 1.421666  | 4.237727  | 0.000000  |
| 1  | 0 | 1.392053  | 1.584163  | 2.147043  |
| 1  | 0 | 1.392053  | 1.584163  | -2.147043 |
| 1  | 0 | 1.405309  | 4.063633  | 2.149522  |
| 1  | 0 | 1.405309  | 4.063633  | -2.149522 |
| 7  | 0 | 1.357162  | 5.634832  | 0.000000  |
| 1  | 0 | 1.737964  | 6.063733  | 0.831112  |
| 1  | 0 | 1.737964  | 6.063733  | -0.831112 |

**3c** ( $B_o$ ): MP2 = -1051.8605551 a.u.

|   |   |           |           |          |
|---|---|-----------|-----------|----------|
| 6 | 0 | 0.635421  | -2.164779 | 0.000000 |
| 6 | 0 | 2.021869  | -2.535736 | 0.000000 |
| 6 | 0 | -0.345471 | -3.191883 | 0.000000 |
| 6 | 0 | 2.364550  | -3.912958 | 0.000000 |
| 6 | 0 | 0.024680  | -4.523213 | 0.000000 |
| 6 | 0 | 1.389238  | -4.889233 | 0.000000 |
| 6 | 0 | 0.303535  | -0.771952 | 0.000000 |
| 6 | 0 | 3.020743  | -1.528174 | 0.000000 |

|    |   |           |           |           |
|----|---|-----------|-----------|-----------|
| 6  | 0 | 1.303785  | 0.187863  | 0.000000  |
| 6  | 0 | 2.662541  | -0.196482 | 0.000000  |
| 1  | 0 | -1.397142 | -2.930783 | 0.000000  |
| 1  | 0 | 3.414692  | -4.186215 | 0.000000  |
| 1  | 0 | -0.739011 | -5.291970 | 0.000000  |
| 1  | 0 | 1.667644  | -5.936369 | 0.000000  |
| 16 | 0 | -1.428110 | -0.360032 | 0.000000  |
| 1  | 0 | 4.065076  | -1.821290 | 0.000000  |
| 1  | 0 | 1.046446  | 1.239237  | 0.000000  |
| 1  | 0 | 3.426078  | 0.572984  | 0.000000  |
| 6  | 0 | -1.395818 | 1.410222  | 0.000000  |
| 6  | 0 | -1.398738 | 2.113531  | 1.213461  |
| 6  | 0 | -1.398738 | 2.113531  | -1.213461 |
| 6  | 0 | -1.398738 | 3.508756  | 1.204677  |
| 6  | 0 | -1.398738 | 3.508756  | -1.204677 |
| 6  | 0 | -1.397379 | 4.226691  | 0.000000  |
| 1  | 0 | -1.393742 | 1.563839  | 2.147351  |
| 1  | 0 | -1.393742 | 1.563839  | -2.147351 |
| 1  | 0 | -1.396706 | 4.047602  | 2.146412  |
| 1  | 0 | -1.396706 | 4.047602  | -2.146412 |
| 6  | 0 | -1.440752 | 5.732063  | 0.000000  |
| 1  | 0 | -2.470786 | 6.093408  | 0.000000  |
| 1  | 0 | -0.947135 | 6.138308  | 0.882407  |
| 1  | 0 | -0.947135 | 6.138308  | -0.882407 |

**3f (B')**: MP2 = -1471.6978029 a.u.

|    |   |           |           |           |
|----|---|-----------|-----------|-----------|
| 6  | 0 | -1.965208 | 0.171700  | 0.337616  |
| 6  | 0 | -3.019280 | 0.652281  | -0.510513 |
| 6  | 0 | -1.297482 | 1.092932  | 1.185484  |
| 6  | 0 | -3.402104 | 2.016599  | -0.429615 |
| 6  | 0 | -1.691887 | 2.416430  | 1.234502  |
| 6  | 0 | -2.735336 | 2.888541  | 0.406635  |
| 6  | 0 | -1.584097 | -1.203802 | 0.221294  |
| 6  | 0 | -3.717852 | -0.257388 | -1.347689 |
| 6  | 0 | -2.276477 | -2.060822 | -0.623126 |
| 6  | 0 | -3.347373 | -1.584829 | -1.411440 |
| 1  | 0 | -0.501397 | 0.738661  | 1.827417  |
| 1  | 0 | -4.208361 | 2.370119  | -1.063655 |
| 1  | 0 | -1.178062 | 3.104455  | 1.895384  |
| 1  | 0 | -3.031890 | 3.929579  | 0.453518  |
| 16 | 0 | -0.289585 | -1.891051 | 1.219311  |
| 1  | 0 | -4.528651 | 0.116901  | -1.963902 |
| 1  | 0 | -1.964851 | -3.096636 | -0.690965 |
| 1  | 0 | -3.879514 | -2.270895 | -2.059608 |
| 6  | 0 | 1.132633  | -1.046084 | 0.574842  |
| 6  | 0 | 1.261968  | -0.751016 | -0.789680 |
| 6  | 0 | 2.164210  | -0.706106 | 1.461456  |
| 6  | 0 | 2.406092  | -0.109113 | -1.260705 |
| 6  | 0 | 3.322705  | -0.088293 | 0.988802  |
| 6  | 0 | 3.432558  | 0.214829  | -0.369464 |
| 1  | 0 | 0.468406  | -1.019188 | -1.477269 |
| 1  | 0 | 2.057814  | -0.920541 | 2.519000  |
| 1  | 0 | 2.508650  | 0.128702  | -2.311934 |
| 1  | 0 | 4.122474  | 0.175334  | 1.669057  |
| 17 | 0 | 4.862959  | 1.007363  | -0.959789 |

**3f (B<sub>o</sub>)**: MP2 = -1471.6947975 a.u.

|    |   |           |           |          |
|----|---|-----------|-----------|----------|
| 6  | 0 | -0.706905 | -2.508658 | 0.000000 |
| 6  | 0 | -2.091543 | -2.886197 | 0.000000 |
| 6  | 0 | 0.279234  | -3.530682 | 0.000000 |
| 6  | 0 | -2.427522 | -4.265033 | 0.000000 |
| 6  | 0 | -0.084510 | -4.863762 | 0.000000 |
| 6  | 0 | -1.447273 | -5.236324 | 0.000000 |
| 6  | 0 | -0.383319 | -1.114151 | 0.000000 |
| 6  | 0 | -3.095388 | -1.883543 | 0.000000 |
| 6  | 0 | -1.387613 | -0.158874 | 0.000000 |
| 6  | 0 | -2.744540 | -0.549999 | 0.000000 |
| 1  | 0 | 1.329887  | -3.265309 | 0.000000 |
| 1  | 0 | -3.476236 | -4.543449 | 0.000000 |
| 1  | 0 | 0.682871  | -5.628764 | 0.000000 |
| 1  | 0 | -1.720426 | -6.284787 | 0.000000 |
| 16 | 0 | 1.348030  | -0.696818 | 0.000000 |

|    |   |           |           |           |
|----|---|-----------|-----------|-----------|
| 1  | 0 | -4.138178 | -2.181888 | 0.000000  |
| 1  | 0 | -1.137320 | 0.894140  | 0.000000  |
| 1  | 0 | -3.511819 | 0.215584  | 0.000000  |
| 6  | 0 | 1.308344  | 1.072161  | 0.000000  |
| 6  | 0 | 1.313502  | 1.775333  | 1.214106  |
| 6  | 0 | 1.313502  | 1.775333  | -1.214106 |
| 6  | 0 | 1.313502  | 3.170205  | 1.216609  |
| 6  | 0 | 1.313502  | 3.170205  | -1.216609 |
| 6  | 0 | 1.315413  | 3.857543  | 0.000000  |
| 1  | 0 | 1.311555  | 1.226535  | 2.148195  |
| 1  | 0 | 1.311555  | 1.226535  | -2.148195 |
| 1  | 0 | 1.317764  | 3.721076  | 2.148410  |
| 1  | 0 | 1.317764  | 3.721076  | -2.148410 |
| 17 | 0 | 1.318458  | 5.594529  | 0.000000  |

**3j (B')**: MP2 = -1216.6707500 a.u.

|    |   |           |           |           |
|----|---|-----------|-----------|-----------|
| 6  | 0 | -2.204402 | 0.150885  | -0.354988 |
| 6  | 0 | -3.233089 | 0.731260  | 0.461259  |
| 6  | 0 | -1.542942 | 0.970324  | -1.306027 |
| 6  | 0 | -3.602532 | 2.084748  | 0.246303  |
| 6  | 0 | -1.923728 | 2.286514  | -1.484979 |
| 6  | 0 | -2.943326 | 2.855892  | -0.689015 |
| 6  | 0 | -1.834618 | -1.208586 | -0.099201 |
| 6  | 0 | -3.921136 | -0.076636 | 1.404766  |
| 6  | 0 | -2.514294 | -1.964349 | 0.845964  |
| 6  | 0 | -3.561575 | -1.393983 | 1.602472  |
| 1  | 0 | -0.768438 | 0.539160  | -1.927500 |
| 1  | 0 | -4.390333 | 2.513279  | 0.856667  |
| 1  | 0 | -1.416529 | 2.895394  | -2.223904 |
| 1  | 0 | -3.228759 | 3.890349  | -0.837901 |
| 16 | 0 | -0.574005 | -2.011869 | -1.050929 |
| 1  | 0 | -4.713730 | 0.370524  | 1.995455  |
| 1  | 0 | -2.210961 | -2.990656 | 1.016837  |
| 1  | 0 | -4.085324 | -2.000652 | 2.331432  |
| 6  | 0 | 0.884067  | -1.161570 | -0.515315 |
| 6  | 0 | 1.981255  | -1.134616 | -1.391569 |
| 6  | 0 | 0.982142  | -0.553845 | 0.745939  |
| 6  | 0 | 3.171874  | -0.518749 | -1.012877 |
| 6  | 0 | 2.160364  | 0.084180  | 1.126241  |
| 6  | 0 | 3.236891  | 0.088552  | 0.240210  |
| 1  | 0 | 1.897773  | -1.592685 | -2.370732 |
| 1  | 0 | 0.139279  | -0.583251 | 1.425591  |
| 1  | 0 | 4.027548  | -0.485796 | -1.672194 |
| 1  | 0 | 2.257091  | 0.562750  | 2.090536  |
| 7  | 0 | 4.480622  | 0.757824  | 0.639461  |
| 8  | 0 | 5.426105  | 0.745536  | -0.167508 |
| 8  | 0 | 4.511695  | 1.295289  | 1.759915  |

**3j (B<sub>o</sub>)**: MP2 = -1216.6661046 a.u.

|    |   |           |           |           |
|----|---|-----------|-----------|-----------|
| 6  | 0 | -0.757866 | -2.754930 | 0.000000  |
| 6  | 0 | -2.141867 | -3.134713 | 0.000000  |
| 6  | 0 | 0.230290  | -3.774908 | 0.000000  |
| 6  | 0 | -2.475389 | -4.514114 | 0.000000  |
| 6  | 0 | -0.131104 | -5.108614 | 0.000000  |
| 6  | 0 | -1.493212 | -5.483428 | 0.000000  |
| 6  | 0 | -0.438264 | -1.359708 | 0.000000  |
| 6  | 0 | -3.147643 | -2.133952 | 0.000000  |
| 6  | 0 | -1.443743 | -0.405760 | 0.000000  |
| 6  | 0 | -2.799950 | -0.799715 | 0.000000  |
| 1  | 0 | 1.280732  | -3.508457 | 0.000000  |
| 1  | 0 | -3.523521 | -4.794419 | 0.000000  |
| 1  | 0 | 0.637599  | -5.872211 | 0.000000  |
| 1  | 0 | -1.764385 | -6.532350 | 0.000000  |
| 16 | 0 | 1.294077  | -0.943221 | 0.000000  |
| 1  | 0 | -4.189794 | -2.434297 | 0.000000  |
| 1  | 0 | -1.197497 | 0.648112  | 0.000000  |
| 1  | 0 | -3.568681 | -0.035714 | 0.000000  |
| 6  | 0 | 1.250865  | 0.826144  | 0.000000  |
| 6  | 0 | 1.256475  | 1.527921  | 1.216283  |
| 6  | 0 | 1.256475  | 1.527921  | -1.216283 |
| 6  | 0 | 1.256475  | 2.922221  | 1.223825  |
| 6  | 0 | 1.256475  | 2.922221  | -1.223825 |



|   |   |          |          |           |
|---|---|----------|----------|-----------|
| 6 | 0 | 1.259073 | 3.590462 | 0.000000  |
| 1 | 0 | 1.254652 | 0.975206 | 2.147822  |
| 1 | 0 | 1.254652 | 0.975206 | -2.147822 |
| 1 | 0 | 1.260424 | 3.487291 | 2.145019  |
| 1 | 0 | 1.260424 | 3.487291 | -2.145019 |
| 7 | 0 | 1.259560 | 5.062274 | 0.000000  |
| 8 | 0 | 1.259418 | 5.636105 | 1.102102  |
| 8 | 0 | 1.259418 | 5.636105 | -1.102102 |

**4a (A):** MP2 = -690.0839115 a.u.

|   |   |           |           |           |
|---|---|-----------|-----------|-----------|
| 6 | 0 | 1.279207  | -0.107026 | -0.377768 |
| 6 | 0 | 2.537489  | 0.153068  | 0.257052  |
| 6 | 0 | 0.394313  | 0.988623  | -0.568390 |
| 6 | 0 | 0.756394  | 2.282049  | -0.255838 |
| 6 | 0 | 2.014797  | 2.529316  | 0.338428  |
| 6 | 0 | 2.895767  | 1.491243  | 0.569501  |
| 1 | 0 | 0.051784  | 3.082811  | -0.443877 |
| 1 | 0 | 2.296224  | 3.546265  | 0.583944  |
| 1 | 0 | 3.858697  | 1.682182  | 1.030764  |
| 6 | 0 | 0.915155  | -1.438662 | -0.702599 |
| 6 | 0 | 1.802081  | -2.471766 | -0.471762 |
| 6 | 0 | 3.055147  | -2.222286 | 0.136160  |
| 6 | 0 | 3.424843  | -0.934564 | 0.468999  |
| 1 | 0 | -0.040776 | -1.623230 | -1.176531 |
| 1 | 0 | 1.525821  | -3.486664 | -0.732191 |
| 1 | 0 | 3.739734  | -3.043709 | 0.311237  |
| 1 | 0 | 4.386976  | -0.742138 | 0.931989  |
| 8 | 0 | -0.818459 | 0.764441  | -1.199658 |
| 6 | 0 | -1.866524 | 0.310044  | -0.419253 |
| 6 | 0 | -3.067443 | 0.083161  | -1.097982 |
| 6 | 0 | -4.174288 | -0.380206 | -0.388484 |
| 6 | 0 | -4.084093 | -0.621820 | 0.986393  |
| 6 | 0 | -2.876464 | -0.391506 | 1.647481  |
| 6 | 0 | -1.754727 | 0.072335  | 0.953253  |
| 1 | 0 | -3.111293 | 0.278278  | -2.162208 |
| 1 | 0 | -5.106727 | -0.554330 | -0.911907 |
| 1 | 0 | -4.945483 | -0.981976 | 1.534531  |
| 1 | 0 | -2.796793 | -0.576247 | 2.712183  |
| 1 | 0 | -0.820411 | 0.251211  | 1.468179  |

**4a (TS-AB'):** MP2 = -690.0833142 a.u.

|   |   |           |           |           |
|---|---|-----------|-----------|-----------|
| 6 | 0 | 1.449965  | -0.217889 | -0.265808 |
| 6 | 0 | 2.607910  | 0.518443  | 0.149686  |
| 6 | 0 | 0.298188  | 0.517520  | -0.649876 |
| 6 | 0 | 0.254404  | 1.896081  | -0.582576 |
| 6 | 0 | 1.394273  | 2.606514  | -0.146028 |
| 6 | 0 | 2.542017  | 1.933950  | 0.227573  |
| 1 | 0 | -0.648355 | 2.412965  | -0.885346 |
| 1 | 0 | 1.356873  | 3.688058  | -0.093329 |
| 1 | 0 | 3.417716  | 2.483701  | 0.555151  |
| 6 | 0 | 1.497969  | -1.633964 | -0.333232 |
| 6 | 0 | 2.645357  | -2.302733 | 0.044729  |
| 6 | 0 | 3.789700  | -1.586139 | 0.468860  |
| 6 | 0 | 3.764892  | -0.207581 | 0.536593  |
| 1 | 0 | 0.618654  | -2.171347 | -0.665015 |
| 1 | 0 | 2.678156  | -3.384864 | -0.001541 |
| 1 | 0 | 4.682476  | -2.125658 | 0.762111  |
| 1 | 0 | 4.642455  | 0.341477  | 0.861535  |
| 8 | 0 | -0.779863 | -0.199099 | -1.139951 |
| 6 | 0 | -1.954632 | -0.170342 | -0.410128 |
| 6 | 0 | -3.114081 | -0.522403 | -1.105728 |
| 6 | 0 | -4.330592 | -0.564651 | -0.424819 |
| 6 | 0 | -1.992651 | 0.139012  | 0.952484  |
| 6 | 0 | -3.221372 | 0.095032  | 1.616890  |
| 6 | 0 | -4.390685 | -0.253112 | 0.937041  |
| 1 | 0 | -5.231894 | -0.834936 | -0.961714 |
| 1 | 0 | -3.040813 | -0.754535 | -2.160773 |
| 1 | 0 | -3.258187 | 0.331613  | 2.673622  |
| 1 | 0 | -1.085102 | 0.403474  | 1.478866  |
| 1 | 0 | -5.337046 | -0.283591 | 1.462080  |

**4a (B'):** MP2 = -690.0835 a.u.

|    |   |   |           |           |           |
|----|---|---|-----------|-----------|-----------|
| 1  | 6 | 0 | -0.030064 | -1.649056 | 0.000000  |
| 2  | 6 | 0 | -1.181832 | -2.496049 | 0.000000  |
| 3  | 6 | 0 | -0.231405 | -0.235557 | 0.000000  |
| 4  | 6 | 0 | -1.496549 | 0.303173  | 0.000000  |
| 5  | 6 | 0 | -2.622997 | -0.552008 | 0.000000  |
| 6  | 6 | 0 | -2.478107 | -1.915182 | 0.000000  |
| 7  | 1 | 0 | -1.632879 | 1.376201  | 0.000000  |
| 8  | 1 | 0 | -3.612579 | -0.108964 | 0.000000  |
| 9  | 1 | 0 | -3.346238 | -2.564835 | 0.000000  |
| 10 | 6 | 0 | 1.261915  | -2.232214 | 0.000000  |
| 11 | 6 | 0 | 1.411293  | -3.599005 | 0.000000  |
| 12 | 6 | 0 | 0.277356  | -4.441549 | 0.000000  |
| 13 | 6 | 0 | -0.985919 | -3.901392 | 0.000000  |
| 14 | 1 | 0 | 2.127527  | -1.582989 | 0.000000  |
| 15 | 1 | 0 | 2.403994  | -4.034871 | 0.000000  |
| 16 | 1 | 0 | 0.407972  | -5.518000 | 0.000000  |
| 17 | 1 | 0 | -1.858343 | -4.546494 | 0.000000  |
| 18 | 8 | 0 | 0.923673  | 0.516352  | 0.000000  |
| 19 | 6 | 0 | 0.842292  | 1.902852  | 0.000000  |
| 20 | 6 | 0 | 0.843011  | 2.587331  | 1.211508  |
| 21 | 6 | 0 | 0.843011  | 3.980630  | 1.206199  |
| 22 | 6 | 0 | 0.843011  | 2.587331  | -1.211508 |
| 23 | 6 | 0 | 0.843011  | 3.980630  | -1.206199 |
| 24 | 6 | 0 | 0.841732  | 4.679216  | 0.000000  |
| 25 | 1 | 0 | 0.848401  | 4.519663  | 2.146759  |
| 26 | 1 | 0 | 0.850547  | 2.025958  | 2.138019  |
| 27 | 1 | 0 | 0.848401  | 4.519663  | -2.146759 |
| 28 | 1 | 0 | 0.850547  | 2.025958  | -2.138019 |
| 29 | 1 | 0 | 0.844715  | 5.763006  | 0.000000  |

**4a** (TS-B'B'): MP2 = -690.0831199 a.u.

|   |   |           |           |           |
|---|---|-----------|-----------|-----------|
| 6 | 0 | 1.623481  | -0.258202 | -0.024048 |
| 6 | 0 | 2.633463  | 0.755666  | 0.013972  |
| 6 | 0 | 0.260043  | 0.153619  | -0.005241 |
| 6 | 0 | -0.094903 | 1.488807  | -0.028450 |
| 6 | 0 | 0.920252  | 2.474225  | -0.015096 |
| 6 | 0 | 2.253740  | 2.123864  | -0.019054 |
| 1 | 0 | -1.136929 | 1.778798  | -0.023357 |
| 1 | 0 | 0.633532  | 3.519165  | -0.032674 |
| 1 | 0 | 3.024629  | 2.886327  | -0.004739 |
| 6 | 0 | 1.996188  | -1.625938 | 0.008428  |
| 6 | 0 | 3.331978  | -1.978786 | 0.007197  |
| 6 | 0 | 4.337806  | -0.985239 | 0.020491  |
| 6 | 0 | 3.993816  | 0.351790  | 0.001330  |
| 1 | 0 | 1.221794  | -2.381686 | -0.003644 |
| 1 | 0 | 3.611850  | -3.025570 | 0.023137  |
| 1 | 0 | 5.381680  | -1.275966 | 0.018283  |
| 1 | 0 | 4.764163  | 1.115800  | 0.012736  |
| 8 | 0 | -0.653650 | -0.881183 | -0.004493 |
| 6 | 0 | -1.998014 | -0.540658 | 0.001192  |
| 6 | 0 | -2.675035 | -0.435086 | -1.213969 |
| 6 | 0 | -4.043956 | -0.157339 | -1.201355 |
| 6 | 0 | -4.718157 | 0.008265  | 0.012290  |
| 6 | 0 | -4.023444 | -0.104840 | 1.220506  |
| 6 | 0 | -2.654625 | -0.382879 | 1.222100  |
| 1 | 0 | -2.126817 | -0.572506 | -2.137712 |
| 1 | 0 | -4.582730 | -0.075414 | -2.137510 |
| 1 | 0 | -5.779983 | 0.220790  | 0.016680  |
| 1 | 0 | -4.546452 | 0.017472  | 2.161191  |
| 1 | 0 | -2.091344 | -0.481352 | 2.141782  |

**4a** (B<sub>0</sub>): MP2 = -690.0831199 a.u.

|   |   |           |           |           |
|---|---|-----------|-----------|-----------|
| 6 | 0 | 1.623481  | -0.258202 | -0.024048 |
| 6 | 0 | 2.633463  | 0.755666  | 0.013972  |
| 6 | 0 | 0.260043  | 0.153619  | -0.005241 |
| 6 | 0 | -0.094903 | 1.488807  | -0.028450 |
| 6 | 0 | 0.920252  | 2.474225  | -0.015096 |
| 6 | 0 | 2.253740  | 2.123864  | -0.019054 |
| 1 | 0 | -1.136929 | 1.778798  | -0.023357 |
| 1 | 0 | 0.633532  | 3.519165  | -0.032674 |
| 1 | 0 | 3.024629  | 2.886327  | -0.004739 |
| 6 | 0 | 1.996188  | -1.625938 | 0.008428  |

|   |   |           |           |           |
|---|---|-----------|-----------|-----------|
| 6 | 0 | 3.331978  | -1.978786 | 0.007197  |
| 6 | 0 | 4.337806  | -0.985239 | 0.020491  |
| 6 | 0 | 3.993816  | 0.351790  | 0.001330  |
| 1 | 0 | 1.221794  | -2.381686 | -0.003644 |
| 1 | 0 | 3.611850  | -3.025570 | 0.023137  |
| 1 | 0 | 5.381680  | -1.275966 | 0.018283  |
| 1 | 0 | 4.764163  | 1.115800  | 0.012736  |
| 8 | 0 | -0.653650 | -0.881183 | -0.004493 |
| 6 | 0 | -1.998014 | -0.540658 | 0.001192  |
| 6 | 0 | -2.675035 | -0.435086 | -1.213969 |
| 6 | 0 | -4.043956 | -0.157339 | -1.201355 |
| 6 | 0 | -4.718157 | 0.008265  | 0.012290  |
| 6 | 0 | -4.023444 | -0.104840 | 1.220506  |
| 6 | 0 | -2.654625 | -0.382879 | 1.222100  |
| 1 | 0 | -2.126817 | -0.572506 | -2.137712 |
| 1 | 0 | -4.582730 | -0.075414 | -2.137510 |
| 1 | 0 | -5.779983 | 0.220790  | 0.016680  |
| 1 | 0 | -4.546452 | 0.017472  | 2.161191  |
| 1 | 0 | -2.091344 | -0.481352 | 2.141782  |

**4a (A<sub>o</sub>):** MP2 = -690.0839115 a.u.

|   |   |           |           |           |
|---|---|-----------|-----------|-----------|
| 6 | 0 | 1.279207  | -0.107026 | -0.377768 |
| 6 | 0 | 2.537489  | 0.153068  | 0.257052  |
| 6 | 0 | 0.394313  | 0.988623  | -0.568390 |
| 6 | 0 | 0.756394  | 2.282049  | -0.255838 |
| 6 | 0 | 2.014797  | 2.529316  | 0.338428  |
| 6 | 0 | 2.895767  | 1.491243  | 0.569501  |
| 1 | 0 | 0.051784  | 3.082811  | -0.443877 |
| 1 | 0 | 2.296224  | 3.546265  | 0.583944  |
| 1 | 0 | 3.858697  | 1.682182  | 1.030764  |
| 6 | 0 | 0.915155  | -1.438662 | -0.702599 |
| 6 | 0 | 1.802081  | -2.471766 | -0.471762 |
| 6 | 0 | 3.055147  | -2.222286 | 0.136160  |
| 6 | 0 | 3.424843  | -0.934564 | 0.468999  |
| 1 | 0 | -0.040776 | -1.623230 | -1.176531 |
| 1 | 0 | 1.525821  | -3.486664 | -0.732191 |
| 1 | 0 | 3.739734  | -3.043709 | 0.311237  |
| 1 | 0 | 4.386976  | -0.742138 | 0.931989  |
| 8 | 0 | -0.818459 | 0.764441  | -1.199658 |
| 6 | 0 | -1.866524 | 0.310044  | -0.419253 |
| 6 | 0 | -3.067443 | 0.083161  | -1.097982 |
| 6 | 0 | -4.174288 | -0.380206 | -0.388484 |
| 6 | 0 | -4.084093 | -0.621820 | 0.986393  |
| 6 | 0 | -2.876464 | -0.391506 | 1.647481  |
| 6 | 0 | -1.754727 | 0.072335  | 0.953253  |
| 1 | 0 | -3.111293 | 0.278278  | -2.162208 |
| 1 | 0 | -5.106727 | -0.554330 | -0.911907 |
| 1 | 0 | -4.945483 | -0.981976 | 1.534531  |
| 1 | 0 | -2.796793 | -0.576247 | 2.712183  |
| 1 | 0 | -0.820411 | 0.251211  | 1.468179  |

**4b' (B')**: MP2 = -745.2844940 a.u.

|   |   |           |           |           |
|---|---|-----------|-----------|-----------|
| 6 | 0 | -2.034134 | -0.252988 | -0.000017 |
| 6 | 0 | -3.032124 | 0.773577  | -0.000027 |
| 6 | 0 | -2.423553 | -1.616567 | -0.000022 |
| 6 | 0 | -4.397297 | 0.385888  | -0.000041 |
| 6 | 0 | -3.763671 | -1.952694 | -0.000036 |
| 6 | 0 | -4.757586 | -0.946996 | -0.000046 |
| 6 | 0 | -0.665411 | 0.142184  | -0.000003 |
| 6 | 0 | -2.635900 | 2.137468  | -0.000022 |
| 6 | 0 | -0.294507 | 1.473352  | 0.000001  |
| 6 | 0 | -1.297892 | 2.470735  | -0.000009 |
| 1 | 0 | -1.657728 | -2.381139 | -0.000015 |
| 1 | 0 | -5.158525 | 1.159178  | -0.000048 |
| 1 | 0 | -4.056587 | -2.996082 | -0.000040 |
| 1 | 0 | -5.804949 | -1.225080 | -0.000057 |
| 1 | 0 | -3.397747 | 2.909189  | -0.000029 |
| 1 | 0 | 0.751368  | 1.749377  | 0.000012  |
| 1 | 0 | -0.998270 | 3.512272  | -0.000005 |
| 8 | 0 | 0.235378  | -0.903046 | 0.000006  |
| 6 | 0 | 1.584373  | -0.575490 | 0.000016  |
| 6 | 0 | 2.262244  | -0.456841 | 1.213105  |

|   |   |          |           |           |
|---|---|----------|-----------|-----------|
| 6 | 0 | 2.262264 | -0.456851 | -1.213062 |
| 6 | 0 | 3.630430 | -0.188550 | 1.209130  |
| 6 | 0 | 3.630449 | -0.188559 | -1.209068 |
| 6 | 0 | 4.335648 | -0.072770 | 0.000037  |
| 1 | 0 | 1.712503 | -0.562284 | 2.140331  |
| 1 | 0 | 1.712538 | -0.562302 | -2.140296 |
| 1 | 0 | 4.163141 | -0.093264 | 2.149179  |
| 1 | 0 | 4.163176 | -0.093280 | -2.149108 |
| 7 | 0 | 5.699039 | 0.264761  | 0.000044  |
| 1 | 0 | 6.187386 | -0.047445 | 0.827659  |
| 1 | 0 | 6.187404 | -0.047478 | -0.827549 |

**4b' (B<sub>0</sub>):** MP2 = -745.2844941 a.u.

|   |   |           |           |           |
|---|---|-----------|-----------|-----------|
| 6 | 0 | -0.143152 | -2.044802 | 0.000000  |
| 6 | 0 | -1.342570 | -2.826605 | 0.000000  |
| 6 | 0 | 1.120010  | -2.689330 | 0.000000  |
| 6 | 0 | -1.224820 | -4.240865 | 0.000000  |
| 6 | 0 | 1.191983  | -4.069082 | 0.000000  |
| 6 | 0 | 0.013826  | -4.850902 | 0.000000  |
| 6 | 0 | -0.267563 | -0.625617 | 0.000000  |
| 6 | 0 | -2.604729 | -2.175338 | 0.000000  |
| 6 | 0 | -1.502482 | -0.005493 | 0.000000  |
| 6 | 0 | -2.674302 | -0.798206 | 0.000000  |
| 1 | 0 | 2.017657  | -2.084940 | 0.000000  |
| 1 | 0 | -2.130138 | -4.839066 | 0.000000  |
| 1 | 0 | 2.159508  | -4.557298 | 0.000000  |
| 1 | 0 | 0.085174  | -5.932201 | 0.000000  |
| 1 | 0 | -3.508626 | -2.774449 | 0.000000  |
| 1 | 0 | -1.572096 | 1.073950  | 0.000000  |
| 1 | 0 | -3.638720 | -0.303766 | 0.000000  |
| 8 | 0 | 0.931466  | 0.057212  | 0.000000  |
| 6 | 0 | 0.869608  | 1.444026  | 0.000000  |
| 6 | 0 | 0.883611  | 2.132068  | 1.213084  |
| 6 | 0 | 0.883611  | 2.132068  | -1.213084 |
| 6 | 0 | 0.883611  | 3.526311  | 1.209099  |
| 6 | 0 | 0.883611  | 3.526311  | -1.209099 |
| 6 | 0 | 0.905684  | 4.240620  | 0.000000  |
| 1 | 0 | 0.881308  | 1.572318  | 2.140314  |
| 1 | 0 | 0.881308  | 1.572318  | -2.140314 |
| 1 | 0 | 0.892605  | 4.067409  | 2.149144  |
| 1 | 0 | 0.892605  | 4.067409  | -2.149144 |
| 7 | 0 | 0.836818  | 5.643480  | 0.000000  |
| 1 | 0 | 1.237173  | 6.062632  | 0.827604  |
| 1 | 0 | 1.237173  | 6.062632  | -0.827604 |

**4c (B<sub>1</sub>):** MP2 = -729.2690181 a.u.

|   |   |           |           |           |
|---|---|-----------|-----------|-----------|
| 6 | 0 | 2.007658  | -0.258393 | -0.069338 |
| 6 | 0 | 3.049749  | 0.720497  | 0.019480  |
| 6 | 0 | 2.322115  | -1.636259 | 0.049881  |
| 6 | 0 | 4.368926  | 0.276576  | 0.297062  |
| 6 | 0 | 3.621041  | -2.028621 | 0.308605  |
| 6 | 0 | 4.654370  | -1.068964 | 0.415756  |
| 6 | 0 | 0.688622  | 0.192757  | -0.354113 |
| 6 | 0 | 2.725096  | 2.098413  | -0.086783 |
| 6 | 0 | 0.390508  | 1.537461  | -0.468980 |
| 6 | 0 | 1.427745  | 2.489960  | -0.347099 |
| 1 | 0 | 1.525213  | -2.364027 | -0.030270 |
| 1 | 0 | 5.160433  | 1.014012  | 0.380577  |
| 1 | 0 | 3.855297  | -3.082001 | 0.407779  |
| 1 | 0 | 5.668667  | -1.391180 | 0.619679  |
| 1 | 0 | 3.516179  | 2.835153  | -0.000929 |
| 1 | 0 | -0.622194 | 1.851561  | -0.686178 |
| 1 | 0 | 1.186343  | 3.542382  | -0.439230 |
| 8 | 0 | -0.250865 | -0.804034 | -0.523813 |
| 6 | 0 | -1.575740 | -0.498590 | -0.258407 |
| 6 | 0 | -1.962213 | 0.014659  | 0.982635  |
| 6 | 0 | -2.519542 | -0.797848 | -1.239095 |
| 6 | 0 | -3.317704 | 0.230050  | 1.229664  |
| 6 | 0 | -3.872540 | -0.582077 | -0.967559 |
| 6 | 0 | -4.292684 | -0.059772 | 0.262762  |
| 1 | 0 | -1.210299 | 0.236269  | 1.730048  |
| 1 | 0 | -2.184112 | -1.193736 | -2.189504 |

|   |   |           |           |           |
|---|---|-----------|-----------|-----------|
| 1 | 0 | -3.622907 | 0.629430  | 2.191146  |
| 1 | 0 | -4.609479 | -0.811565 | -1.729763 |
| 6 | 0 | -5.756088 | 0.137421  | 0.561616  |
| 1 | 0 | -6.179815 | -0.740159 | 1.053389  |
| 1 | 0 | -5.909911 | 0.991919  | 1.220347  |
| 1 | 0 | -6.322410 | 0.310583  | -0.353100 |

**4c (A<sub>g</sub>):** MP2 = -729.2692708 a.u.

|   |   |           |           |           |
|---|---|-----------|-----------|-----------|
| 6 | 0 | 1.662024  | 0.108442  | 0.365638  |
| 6 | 0 | 2.875242  | -0.002470 | -0.389108 |
| 6 | 0 | 0.875467  | -1.063603 | 0.532366  |
| 6 | 0 | 1.298595  | -2.296091 | 0.080936  |
| 6 | 0 | 2.514642  | -2.397647 | -0.632375 |
| 6 | 0 | 3.297561  | -1.279853 | -0.843703 |
| 1 | 0 | 0.670605  | -3.161051 | 0.255642  |
| 1 | 0 | 2.843948  | -3.367075 | -0.986596 |
| 1 | 0 | 4.227630  | -1.358717 | -1.396181 |
| 6 | 0 | 1.235604  | 1.377880  | 0.832591  |
| 6 | 0 | 2.024908  | 2.491179  | 0.620930  |
| 6 | 0 | 3.234640  | 2.388253  | -0.105688 |
| 6 | 0 | 3.662805  | 1.163554  | -0.577355 |
| 1 | 0 | 0.313794  | 1.449801  | 1.396115  |
| 1 | 0 | 1.702249  | 3.457732  | 0.989524  |
| 1 | 0 | 3.842489  | 3.271183  | -0.263898 |
| 1 | 0 | 4.592045  | 1.083305  | -1.131605 |
| 8 | 0 | -0.289949 | -0.984737 | 1.276725  |
| 6 | 0 | -1.429117 | -0.544682 | 0.625495  |
| 6 | 0 | -2.580099 | -0.453819 | 1.412978  |
| 6 | 0 | -3.768937 | -0.013498 | 0.835296  |
| 6 | 0 | -3.830666 | 0.354758  | -0.517267 |
| 6 | 0 | -2.660734 | 0.253952  | -1.279039 |
| 6 | 0 | -1.454913 | -0.183500 | -0.723448 |
| 1 | 0 | -2.524020 | -0.734059 | 2.457628  |
| 1 | 0 | -4.660412 | 0.056737  | 1.449746  |
| 1 | 0 | -2.681074 | 0.536126  | -2.326575 |
| 1 | 0 | -0.560846 | -0.249284 | -1.329085 |
| 6 | 0 | -5.130073 | 0.792810  | -1.141085 |
| 1 | 0 | -5.716922 | -0.063810 | -1.478125 |
| 1 | 0 | -5.738647 | 1.349690  | -0.428554 |
| 1 | 0 | -4.952934 | 1.433325  | -2.004808 |

**4c (B<sub>g</sub>):** MP2 = -729.2686899 a.u.

|   |   |           |           |           |
|---|---|-----------|-----------|-----------|
| 6 | 0 | 0.134770  | -2.054236 | 0.000000  |
| 6 | 0 | 1.332128  | -2.839103 | 0.000000  |
| 6 | 0 | -1.130163 | -2.695146 | 0.000000  |
| 6 | 0 | 1.210695  | -4.253011 | 0.000000  |
| 6 | 0 | -1.205708 | -4.074708 | 0.000000  |
| 6 | 0 | -0.029636 | -4.859614 | 0.000000  |
| 6 | 0 | 0.263539  | -0.635591 | 0.000000  |
| 6 | 0 | 2.596073  | -2.191192 | 0.000000  |
| 6 | 0 | 1.499885  | -0.018458 | 0.000000  |
| 6 | 0 | 2.669639  | -0.814357 | 0.000000  |
| 1 | 0 | -2.026378 | -2.088629 | 0.000000  |
| 1 | 0 | 2.114379  | -4.853619 | 0.000000  |
| 1 | 0 | -2.174501 | -4.560327 | 0.000000  |
| 1 | 0 | -0.103924 | -5.940687 | 0.000000  |
| 1 | 0 | 3.498305  | -2.792760 | 0.000000  |
| 1 | 0 | 1.573284  | 1.060709  | 0.000000  |
| 1 | 0 | 3.635407  | -0.322630 | 0.000000  |
| 8 | 0 | -0.933932 | 0.050643  | 0.000000  |
| 6 | 0 | -0.870993 | 1.436193  | 0.000000  |
| 6 | 0 | -0.871884 | 2.120042  | 1.215479  |
| 6 | 0 | -0.871884 | 2.120042  | -1.215479 |
| 6 | 0 | -0.871884 | 3.515931  | 1.204928  |
| 6 | 0 | -0.871884 | 3.515931  | -1.204928 |
| 6 | 0 | -0.867970 | 4.233622  | 0.000000  |
| 1 | 0 | -0.873774 | 1.556498  | 2.140458  |
| 1 | 0 | -0.873774 | 1.556498  | -2.140458 |
| 1 | 0 | -0.871492 | 4.054669  | 2.146475  |
| 1 | 0 | -0.871492 | 4.054669  | -2.146475 |
| 6 | 0 | -0.911486 | 5.739626  | 0.000000  |
| 1 | 0 | -1.940622 | 6.103315  | 0.000000  |

|   |   |           |          |           |
|---|---|-----------|----------|-----------|
| 1 | 0 | -0.416685 | 6.145658 | 0.881904  |
| 1 | 0 | -0.416685 | 6.145658 | -0.881904 |

**4f (B')**: MP2 = -1149.1037083 a.u.

|    |   |           |           |           |
|----|---|-----------|-----------|-----------|
| 6  | 0 | 2.330118  | -0.255461 | 0.116185  |
| 6  | 0 | 3.390742  | 0.677624  | -0.125976 |
| 6  | 0 | 1.074504  | 0.260093  | 0.535970  |
| 6  | 0 | 0.842975  | 1.617586  | 0.648878  |
| 6  | 0 | 1.891455  | 2.523911  | 0.374850  |
| 6  | 0 | 3.133438  | 2.069548  | -0.022157 |
| 1  | 0 | -0.126365 | 1.973888  | 0.974860  |
| 1  | 0 | 1.704844  | 3.587463  | 0.464350  |
| 1  | 0 | 3.936249  | 2.770208  | -0.223584 |
| 6  | 0 | 2.573298  | -1.648018 | -0.001251 |
| 6  | 0 | 3.816523  | -2.099764 | -0.398402 |
| 6  | 0 | 4.866076  | -1.186458 | -0.654459 |
| 6  | 0 | 4.650388  | 0.172394  | -0.541580 |
| 1  | 0 | 1.764536  | -2.339605 | 0.196208  |
| 1  | 0 | 3.996835  | -3.163886 | -0.494835 |
| 1  | 0 | 5.835908  | -1.556120 | -0.965637 |
| 1  | 0 | 5.454494  | 0.873401  | -0.739267 |
| 8  | 0 | 0.112794  | -0.680288 | 0.860538  |
| 6  | 0 | -1.192610 | -0.427528 | 0.488656  |
| 6  | 0 | -1.515150 | 0.095026  | -0.767766 |
| 6  | 0 | -2.856061 | 0.254394  | -1.116105 |
| 6  | 0 | -2.190515 | -0.799345 | 1.390329  |
| 6  | 0 | -3.531369 | -0.646266 | 1.036160  |
| 6  | 0 | -3.856486 | -0.115987 | -0.213728 |
| 1  | 0 | -3.124539 | 0.654553  | -2.085283 |
| 1  | 0 | -0.728703 | 0.369572  | -1.459062 |
| 1  | 0 | -4.316514 | -0.928451 | 1.725438  |
| 1  | 0 | -1.905832 | -1.203613 | 2.353370  |
| 17 | 0 | -5.526895 | 0.085553  | -0.654617 |

**4f (A<sub>0</sub>)**: MP2 = 1149.1043637 a.u.

|    |   |           |           |           |
|----|---|-----------|-----------|-----------|
| 6  | 0 | 2.000250  | 0.113322  | 0.357549  |
| 6  | 0 | 3.178759  | 0.088970  | -0.457734 |
| 6  | 0 | 1.268011  | -1.096438 | 0.496049  |
| 6  | 0 | 1.712978  | -2.287130 | -0.038173 |
| 6  | 0 | 2.896548  | -2.303549 | -0.810716 |
| 6  | 0 | 3.625700  | -1.145857 | -0.998373 |
| 1  | 0 | 1.126743  | -3.184122 | 0.119269  |
| 1  | 0 | 3.244373  | -3.239615 | -1.230588 |
| 1  | 0 | 4.530340  | -1.159332 | -1.596535 |
| 6  | 0 | 1.550371  | 1.339312  | 0.910646  |
| 6  | 0 | 2.286361  | 2.492415  | 0.721004  |
| 6  | 0 | 3.461848  | 2.474538  | -0.066252 |
| 6  | 0 | 3.912058  | 1.293431  | -0.621218 |
| 1  | 0 | 0.656737  | 1.346542  | 1.522141  |
| 1  | 0 | 1.946695  | 3.425223  | 1.155228  |
| 1  | 0 | 4.027613  | 3.387886  | -0.206337 |
| 1  | 0 | 4.815495  | 1.278438  | -1.221656 |
| 8  | 0 | 0.133819  | -1.101795 | 1.294783  |
| 6  | 0 | -1.046358 | -0.677691 | 0.718576  |
| 6  | 0 | -2.165404 | -0.683360 | 1.556711  |
| 6  | 0 | -3.399857 | -0.267592 | 1.063695  |
| 6  | 0 | -3.504956 | 0.157225  | -0.263517 |
| 6  | 0 | -2.387703 | 0.163718  | -1.098028 |
| 6  | 0 | -1.146779 | -0.251371 | -0.608593 |
| 1  | 0 | -2.053192 | -1.018081 | 2.580279  |
| 1  | 0 | -4.273419 | -0.269921 | 1.702609  |
| 1  | 0 | -2.481843 | 0.495528  | -2.124040 |
| 1  | 0 | -0.278987 | -0.248087 | -1.254250 |
| 17 | 0 | -5.046004 | 0.678838  | -0.880832 |

**4j (B')**: MP2 = -894.2173413 a.u.

|   |   |           |           |           |
|---|---|-----------|-----------|-----------|
| 6 | 0 | -2.673582 | -0.243359 | 0.000033  |
| 6 | 0 | -3.657127 | 0.797048  | -0.000186 |
| 6 | 0 | -1.302758 | 0.138589  | -0.000116 |
| 6 | 0 | -0.910818 | 1.462732  | -0.000450 |
| 6 | 0 | -1.901107 | 2.473725  | -0.000659 |
| 6 | 0 | -3.242545 | 2.155723  | -0.000529 |

|   |   |           |           |           |
|---|---|-----------|-----------|-----------|
| 1 | 0 | 0.137770  | 1.728895  | -0.000561 |
| 1 | 0 | -1.588221 | 3.511036  | -0.000922 |
| 1 | 0 | -3.994331 | 2.937042  | -0.000691 |
| 6 | 0 | -3.079947 | -1.601809 | 0.000381  |
| 6 | 0 | -4.424625 | -1.919166 | 0.000510  |
| 6 | 0 | -5.404607 | -0.900000 | 0.000297  |
| 6 | 0 | -5.027326 | 0.428151  | -0.000042 |
| 1 | 0 | -2.326017 | -2.378149 | 0.000545  |
| 1 | 0 | -4.731687 | -2.958309 | 0.000777  |
| 1 | 0 | -6.455360 | -1.164312 | 0.000402  |
| 1 | 0 | -5.778064 | 1.211343  | -0.000205 |
| 8 | 0 | -0.411002 | -0.922433 | 0.000095  |
| 6 | 0 | 0.934056  | -0.619681 | 0.000077  |
| 6 | 0 | 1.607970  | -0.510879 | 1.219243  |
| 6 | 0 | 2.981844  | -0.275083 | 1.225565  |
| 6 | 0 | 1.608124  | -0.511809 | -1.219082 |
| 6 | 0 | 2.982005  | -0.276041 | -1.225412 |
| 6 | 0 | 3.640008  | -0.165280 | 0.000075  |
| 1 | 0 | 3.539884  | -0.186146 | 2.146729  |
| 1 | 0 | 1.049459  | -0.610692 | 2.141329  |
| 1 | 0 | 3.540162  | -0.187828 | -2.146576 |
| 1 | 0 | 1.049725  | -0.612301 | -2.141162 |
| 7 | 0 | 5.088026  | 0.083941  | 0.000056  |
| 8 | 0 | 5.652954  | 0.182893  | 1.093657  |
| 8 | 0 | 5.653437  | 0.180123  | -1.093538 |

**4j (A<sub>o</sub>):** MP2 = -894.2488580 a.u.

|   |   |           |           |           |
|---|---|-----------|-----------|-----------|
| 6 | 0 | 2.237461  | 0.108271  | 0.361747  |
| 6 | 0 | 3.405550  | 0.149273  | -0.467865 |
| 6 | 0 | 1.535839  | -1.123335 | 0.443311  |
| 6 | 0 | 1.987236  | -2.275417 | -0.164056 |
| 6 | 0 | 3.160981  | -2.226350 | -0.950262 |
| 6 | 0 | 3.863975  | -1.045158 | -1.084594 |
| 1 | 0 | 1.421957  | -3.191590 | -0.043061 |
| 1 | 0 | 3.518371  | -3.130078 | -1.428652 |
| 1 | 0 | 4.760291  | -1.008842 | -1.694152 |
| 6 | 0 | 1.772307  | 1.292774  | 0.988089  |
| 6 | 0 | 2.483718  | 2.468586  | 0.849952  |
| 6 | 0 | 3.647093  | 2.515715  | 0.046088  |
| 6 | 0 | 4.111689  | 1.375671  | -0.578750 |
| 1 | 0 | 0.888799  | 1.250375  | 1.612897  |
| 1 | 0 | 2.133649  | 3.369829  | 1.338936  |
| 1 | 0 | 4.192247  | 3.446656  | -0.053258 |
| 1 | 0 | 5.005943  | 1.411144  | -1.191763 |
| 8 | 0 | 0.412732  | -1.192117 | 1.259044  |
| 6 | 0 | -0.780900 | -0.768424 | 0.734439  |
| 6 | 0 | -1.880572 | -0.841544 | 1.599387  |
| 6 | 0 | -3.134171 | -0.430803 | 1.160468  |
| 6 | 0 | -3.257285 | 0.057855  | -0.142119 |
| 6 | 0 | -2.172246 | 0.136383  | -1.013446 |
| 6 | 0 | -0.916655 | -0.276002 | -0.569568 |
| 1 | 0 | -1.731877 | -1.227319 | 2.600084  |
| 1 | 0 | -4.001743 | -0.477625 | 1.803195  |
| 1 | 0 | -2.314054 | 0.520261  | -2.013914 |
| 1 | 0 | -0.059980 | -0.223959 | -1.227825 |
| 7 | 0 | -4.573724 | 0.492909  | -0.612702 |
| 8 | 0 | -4.662626 | 0.914279  | -1.772070 |
| 8 | 0 | -5.522812 | 0.416064  | 0.176712  |

**4j (B<sub>o</sub>):** MP2 = -894.2173413 a.u.

|   |   |           |           |          |
|---|---|-----------|-----------|----------|
| 6 | 0 | -0.210935 | -2.676332 | 0.000000 |
| 6 | 0 | -1.402283 | -3.470371 | 0.000000 |
| 6 | 0 | -0.356277 | -1.260734 | 0.000000 |
| 6 | 0 | -1.595377 | -0.651139 | 0.000000 |
| 6 | 0 | -2.758868 | -1.456786 | 0.000000 |
| 6 | 0 | -2.671602 | -2.832636 | 0.000000 |
| 1 | 0 | -1.680928 | 0.427313  | 0.000000 |
| 1 | 0 | -3.728572 | -0.973476 | 0.000000 |
| 1 | 0 | -3.568494 | -3.441919 | 0.000000 |
| 6 | 0 | 1.059547  | -3.305930 | 0.000000 |
| 6 | 0 | 1.145632  | -4.684865 | 0.000000 |
| 6 | 0 | -0.024178 | -5.478973 | 0.000000 |

|   |   |           |           |           |
|---|---|-----------|-----------|-----------|
| 6 | 0 | -1.269699 | -4.883153 | 0.000000  |
| 1 | 0 | 1.951894  | -2.693694 | 0.000000  |
| 1 | 0 | 2.118124  | -5.162742 | 0.000000  |
| 1 | 0 | 0.059181  | -6.559248 | 0.000000  |
| 1 | 0 | -2.168261 | -5.491087 | 0.000000  |
| 8 | 0 | 0.839916  | -0.560650 | 0.000000  |
| 6 | 0 | 0.768311  | 0.816197  | 0.000000  |
| 6 | 0 | 0.775057  | 1.498804  | 1.219165  |
| 6 | 0 | 0.774430  | 2.892767  | 1.225490  |
| 6 | 0 | 0.775057  | 1.498804  | -1.219165 |
| 6 | 0 | 0.774430  | 2.892767  | -1.225490 |
| 6 | 0 | 0.776519  | 3.560017  | 0.000000  |
| 1 | 0 | 0.781145  | 3.457811  | 2.146655  |
| 1 | 0 | 0.779685  | 0.931457  | 2.141247  |
| 1 | 0 | 0.781145  | 3.457811  | -2.146655 |
| 1 | 0 | 0.779685  | 0.931457  | -2.141247 |
| 7 | 0 | 0.775231  | 5.029318  | 0.000000  |
| 8 | 0 | 0.774430  | 5.602854  | 1.093596  |
| 8 | 0 | 0.774430  | 5.602854  | -1.093596 |
